# Supplementary material for: Profiling bacterial communities by MinION sequencing of ribosomal operons
Source: PubMed Central journal article supplement (PMC5599880; doi:10.1186/s40168-017-0336-9), 2017-09-15
Supplement: 40168_2017_336_MOESM1_ESM.pdf [file 40168_2017_336_MOESM1_ESM.pdf]

Figure S1:

## QIIME Pipeline

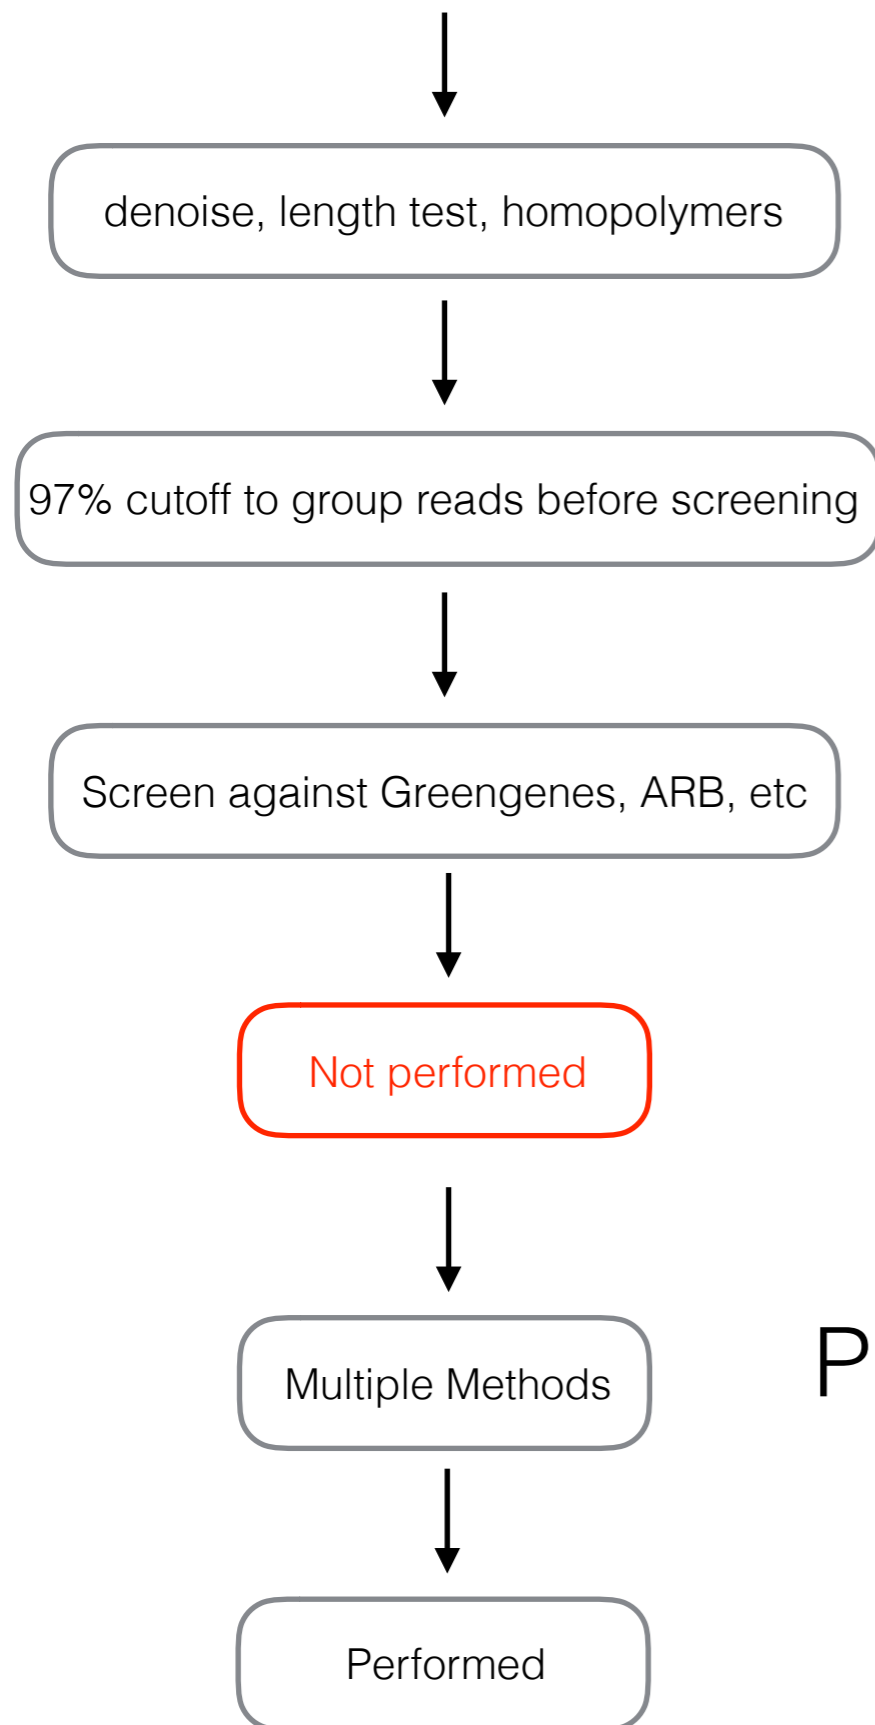

## Geneious/MinION Pipeline

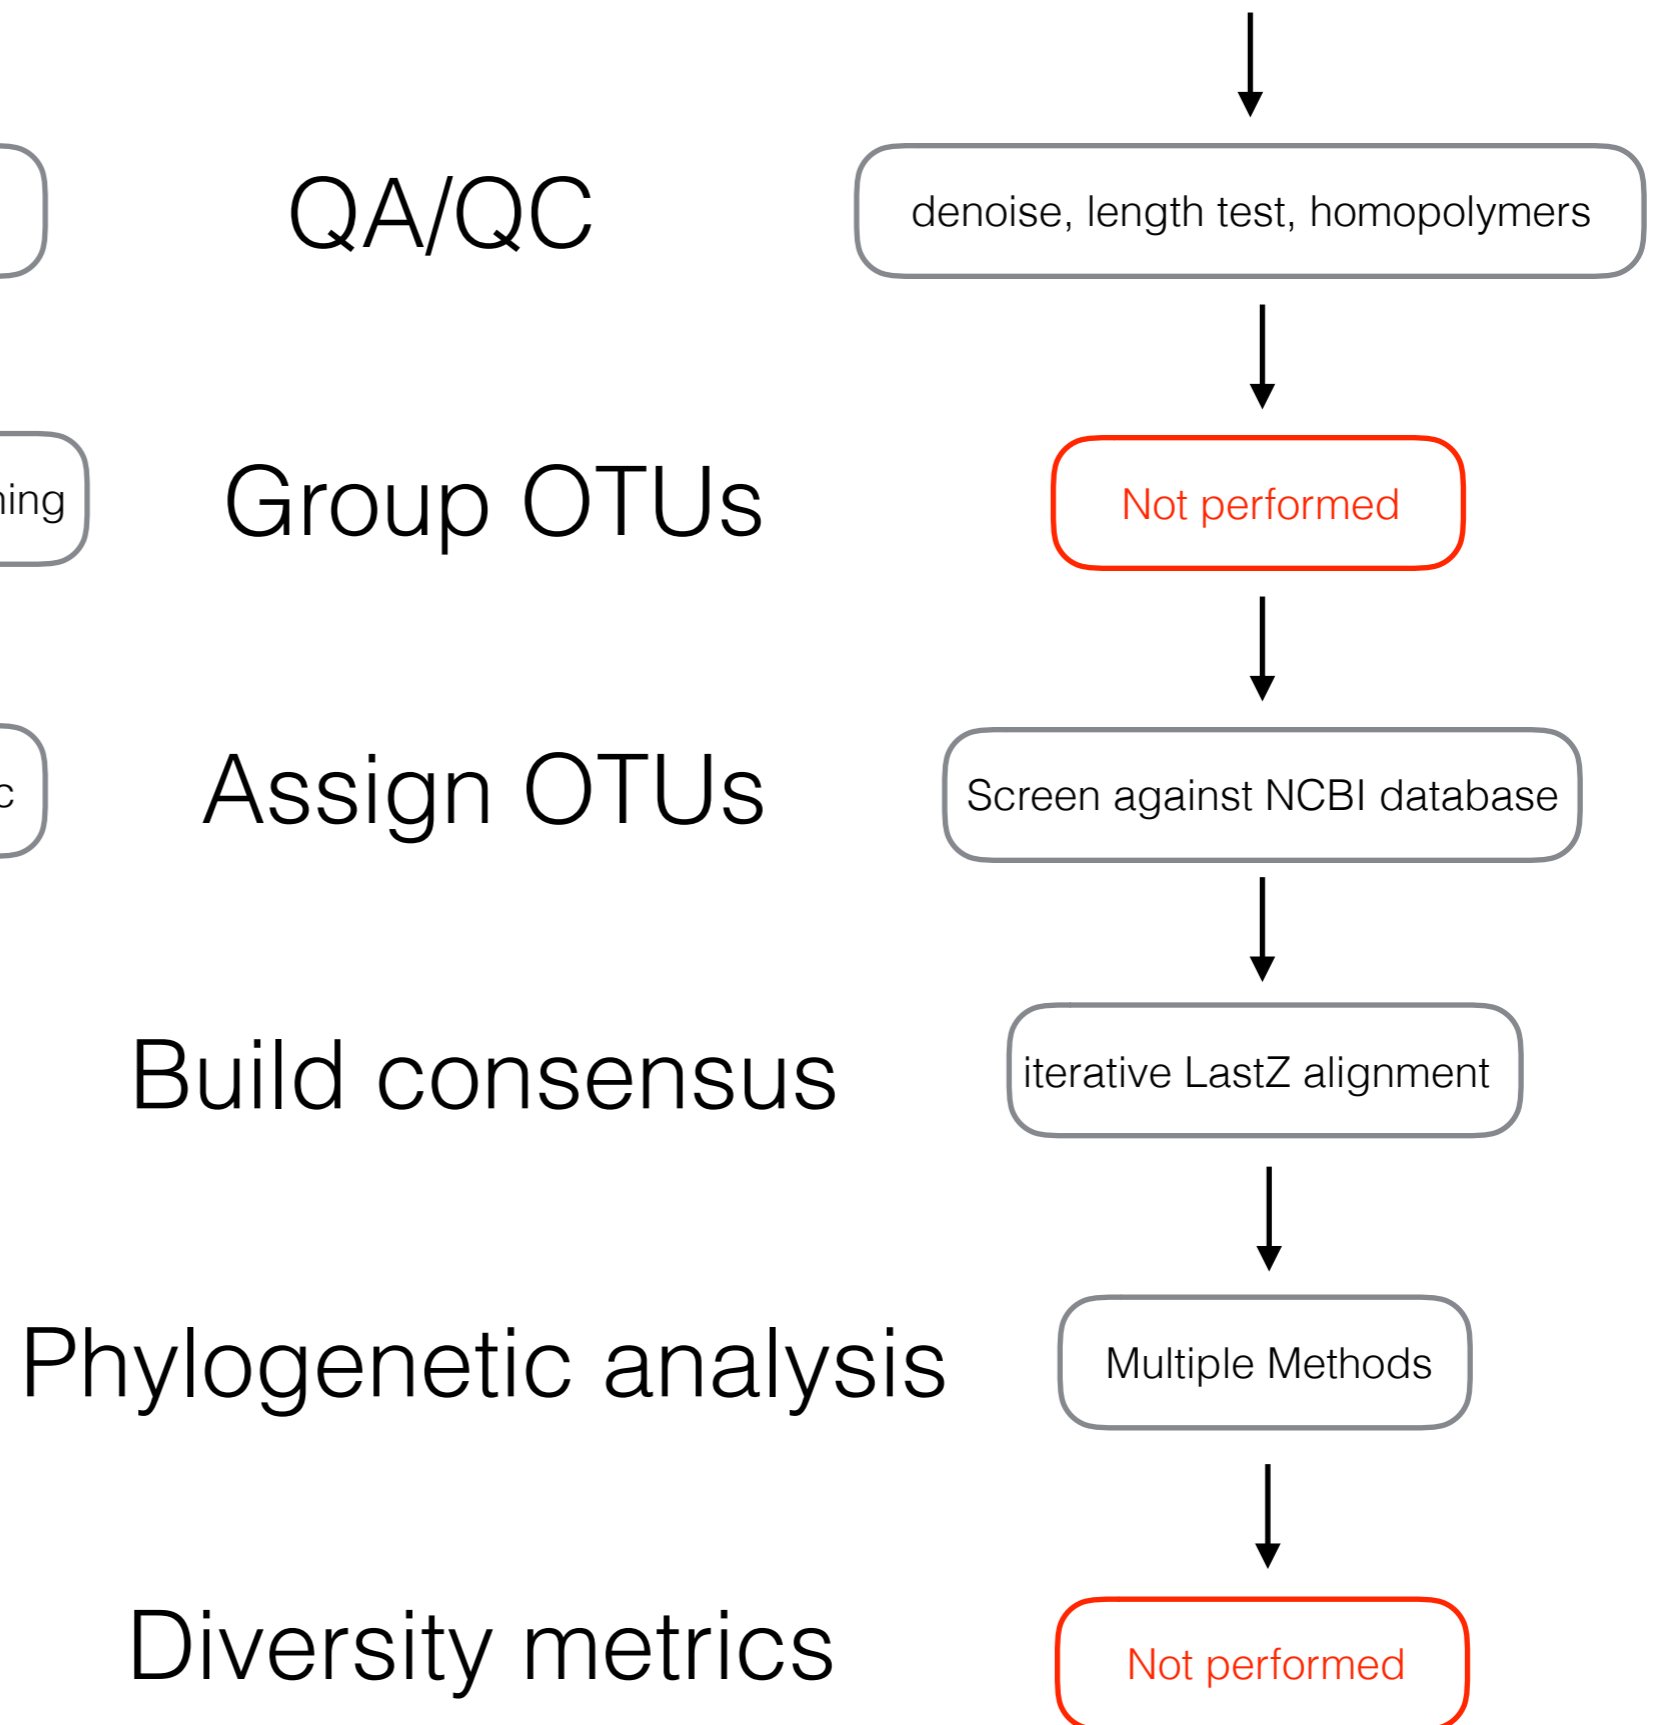

Figure S2:

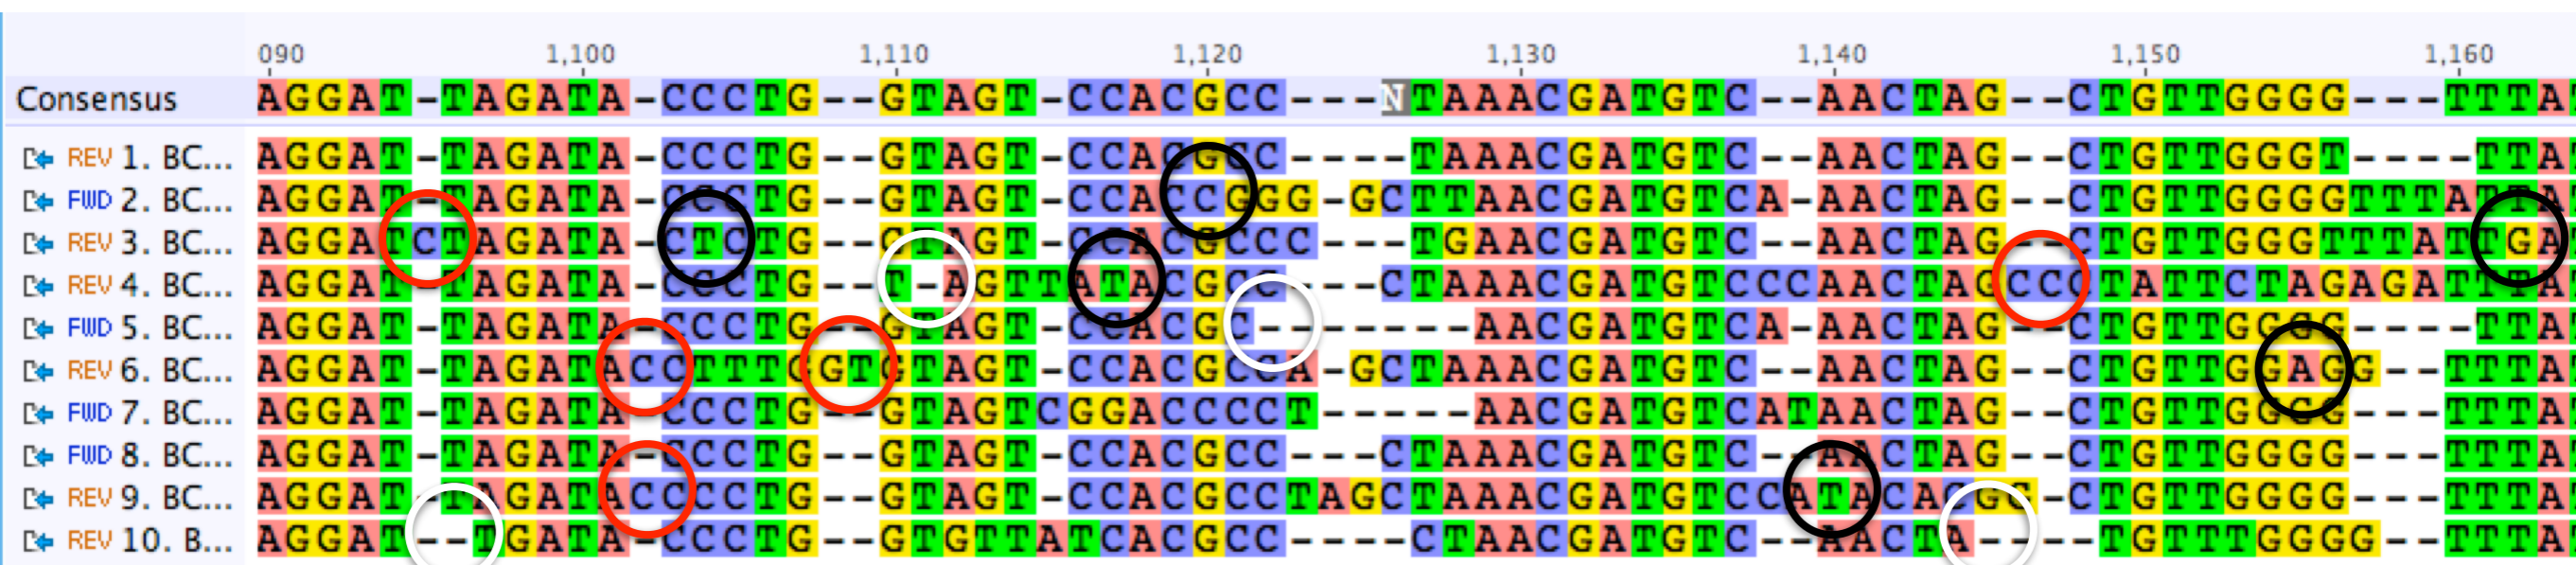

Insertions (red circle), deletions (white circle), and miscalled bases (black circle).

The consensus sequence is shown on the top row.

Figure S3:

Schematic of a bacterial rRNA operon

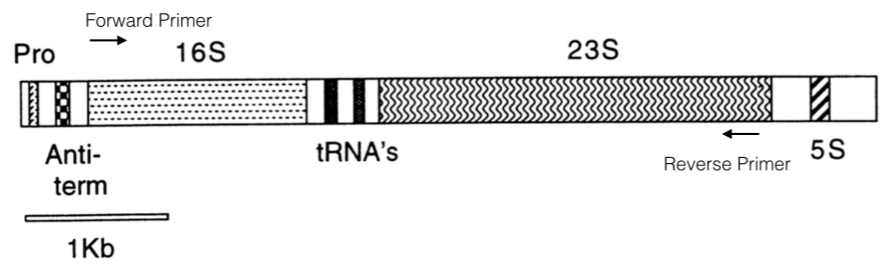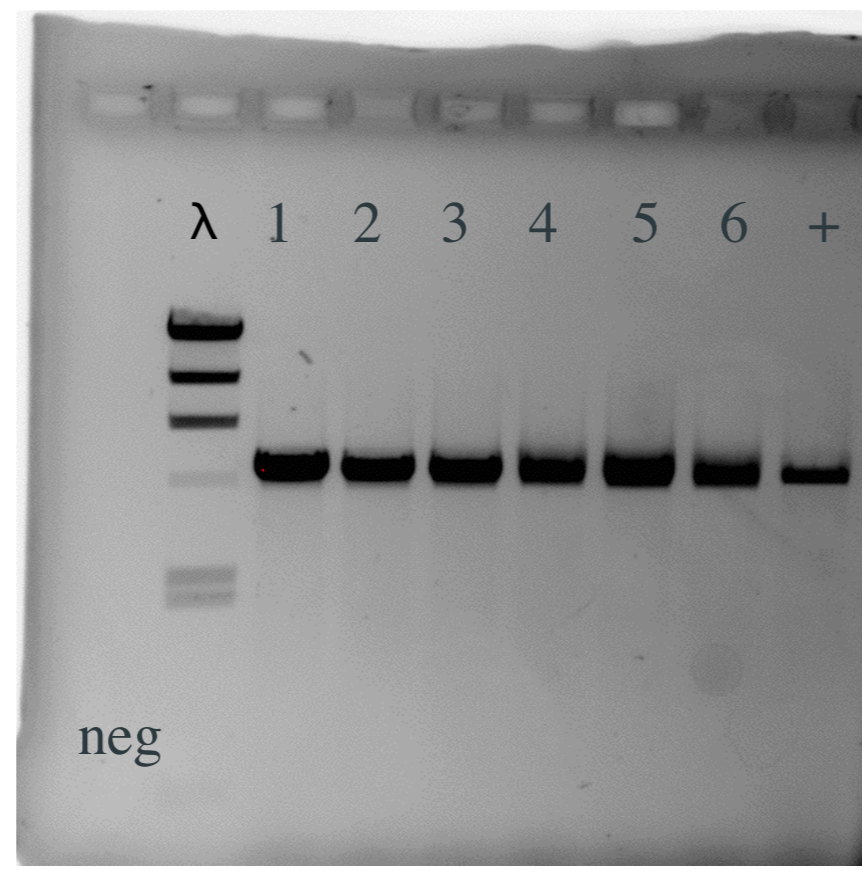

The lanes indicate the various barcoded samples, the PCR negative (neg) and positive (+) controls, and lambda molecular weight standard.

Figure S4:

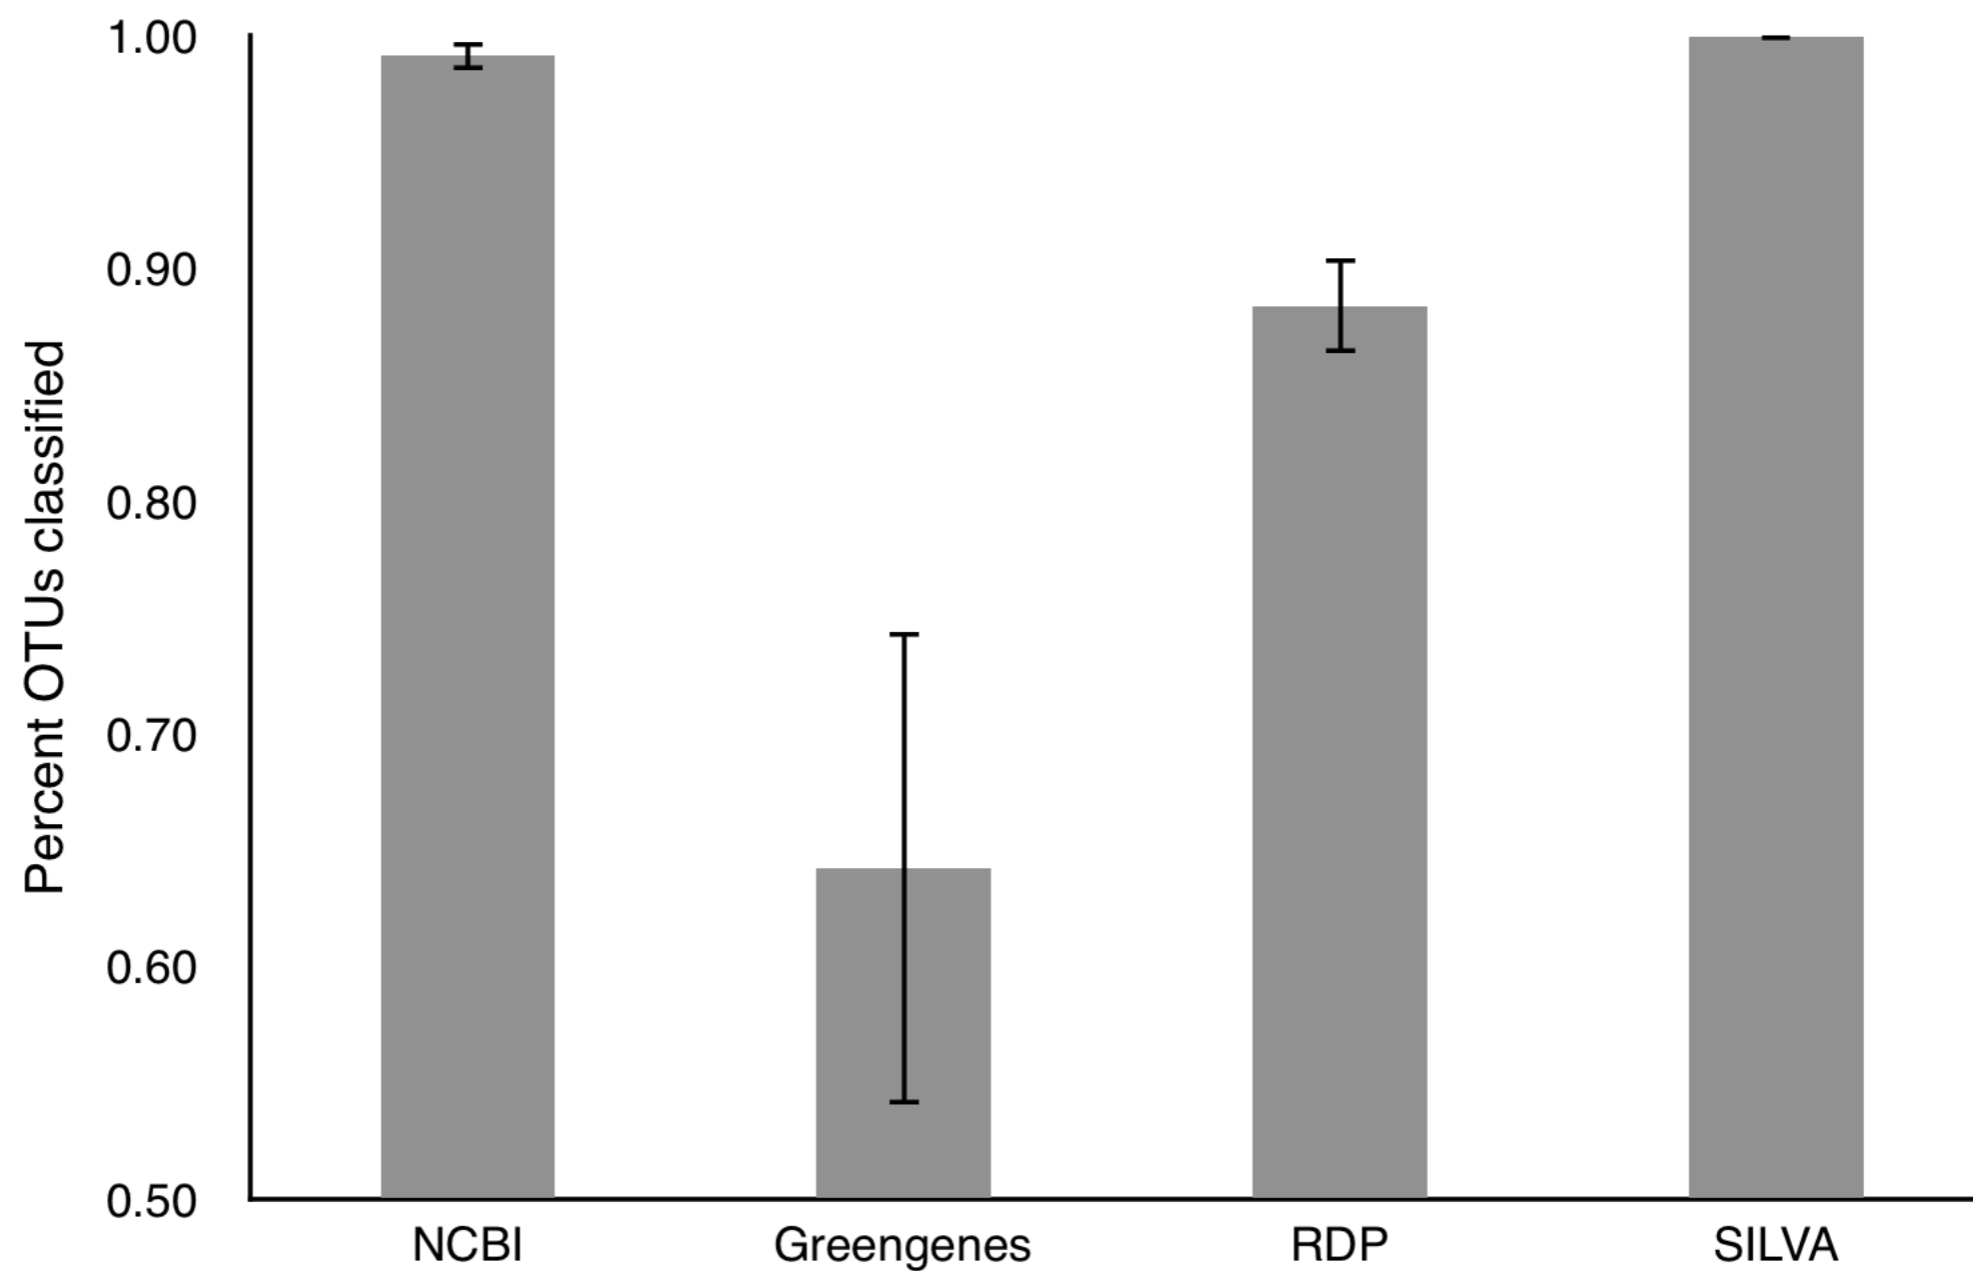

Unclassified OTUs are either defined as unclassified in the database or <70% identity over 500 bp. Data represents averages for the various biological replicates and the error bars are the standard deviation.

Figure S5:

*Stenotrophomonas maltophilia* (100-79% similarity)

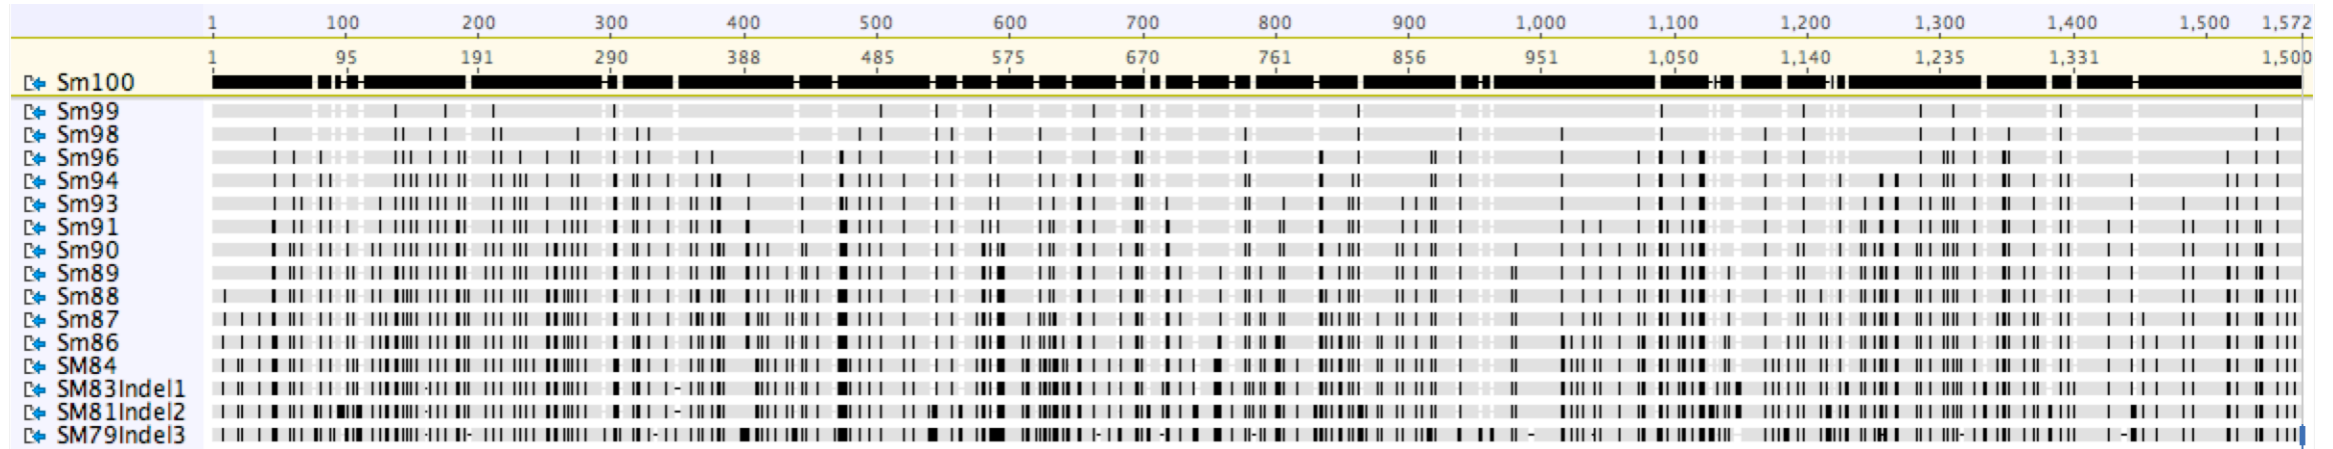

*Comomonas nitratorans* (100-79% similarity)

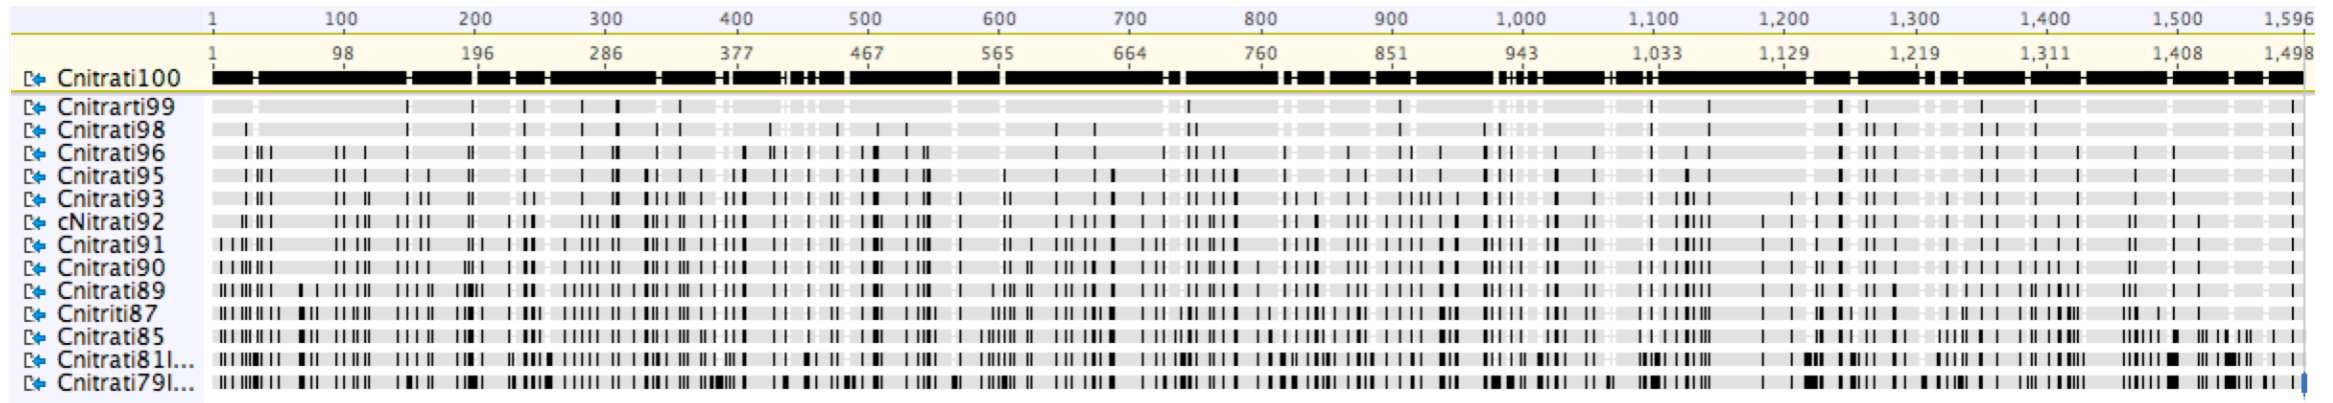

*Comomonas denitrificans* (100-79% similarity)

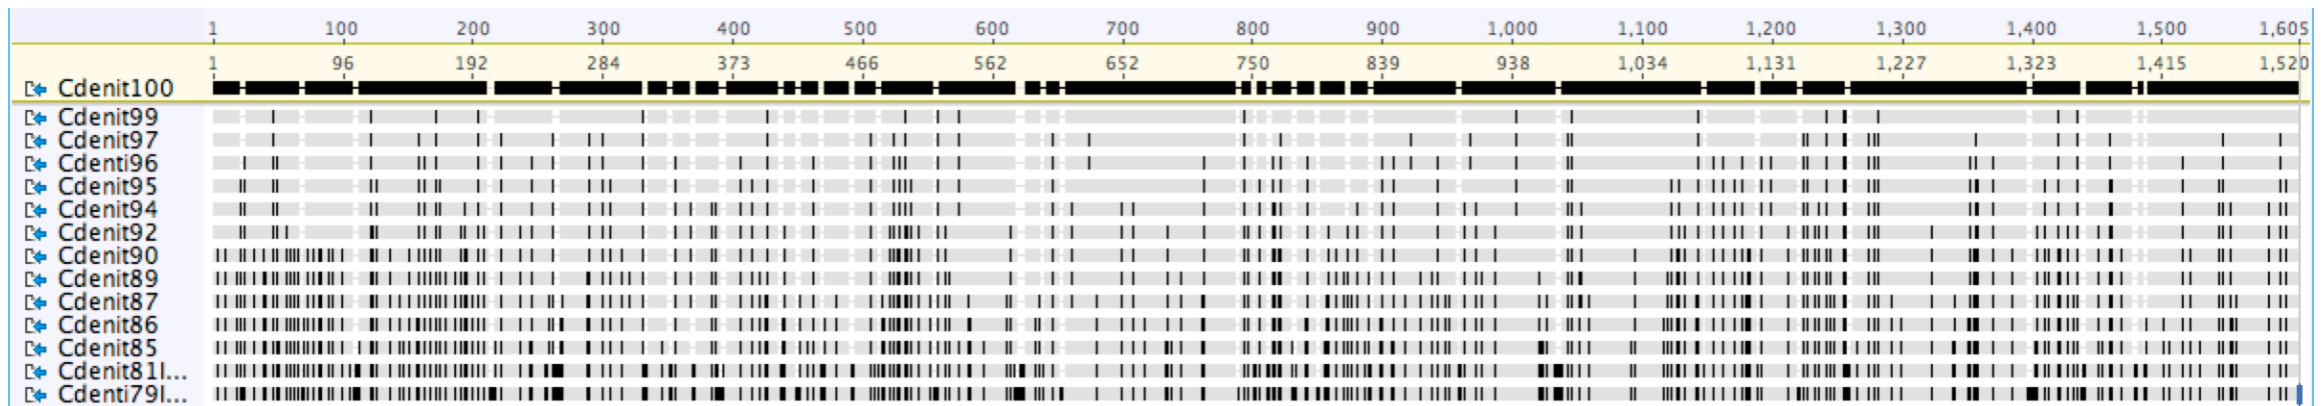

Random substitutions and insertions/deletions were created in three 16S rRNA genes to generate 12-13 sequences between 79-100% identity.

The positions of the substitutions are indicated below by the black lines. All sequences were then screened in Geneious and the results are shown in Additional Table 2.

Figure S6:

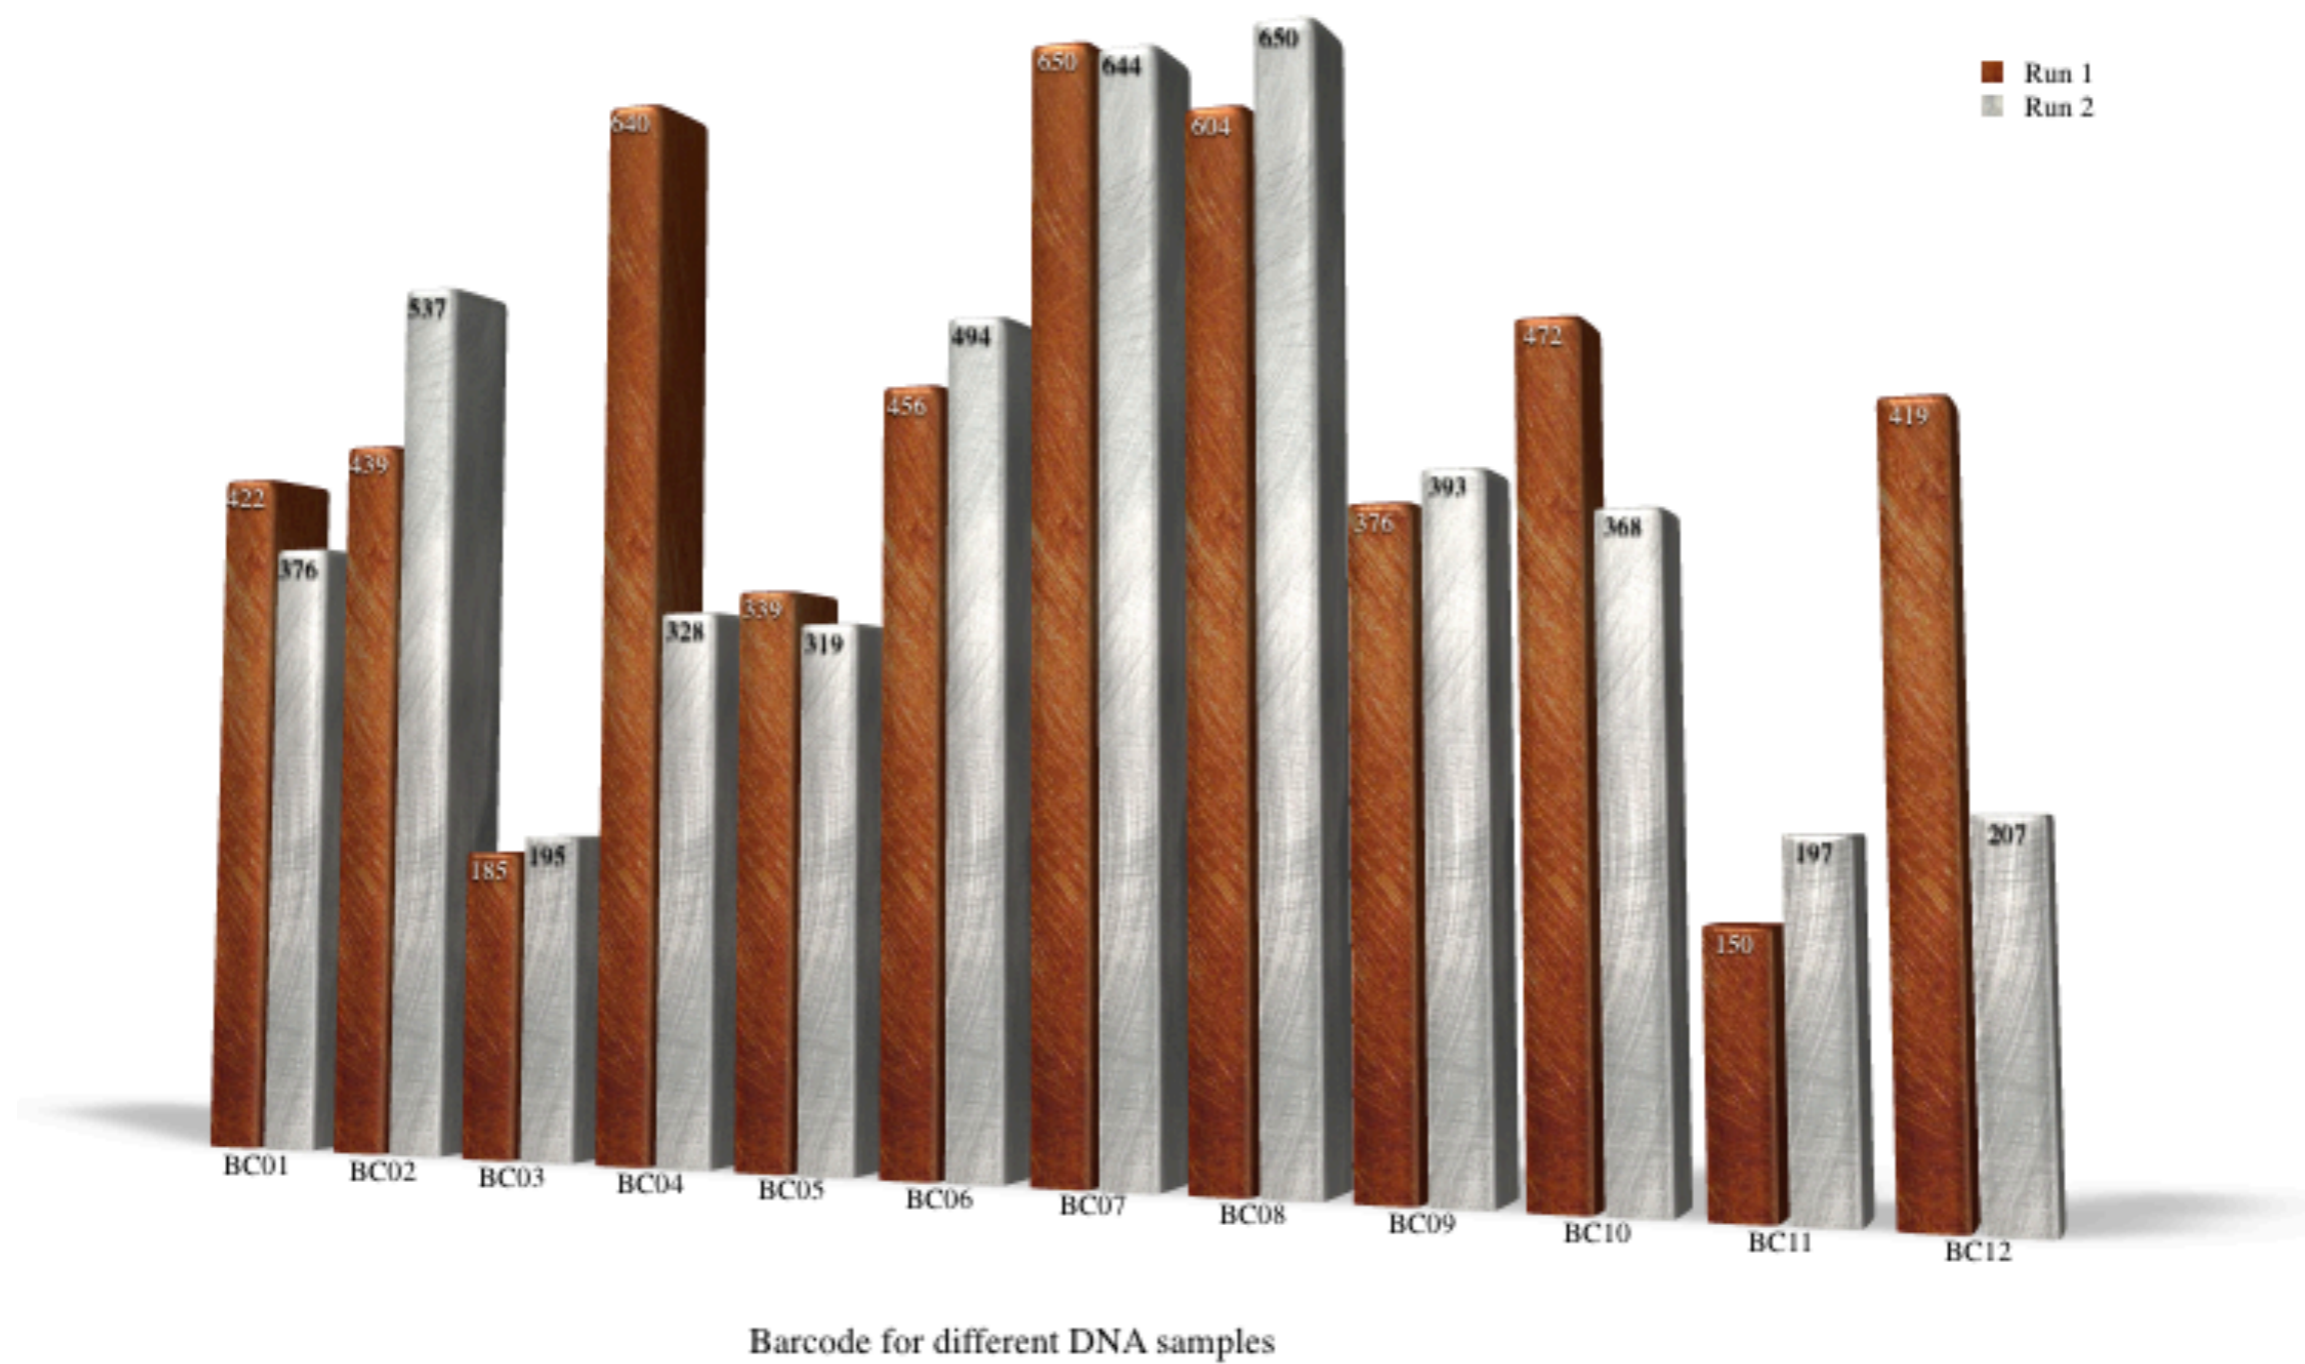

Figure S7:

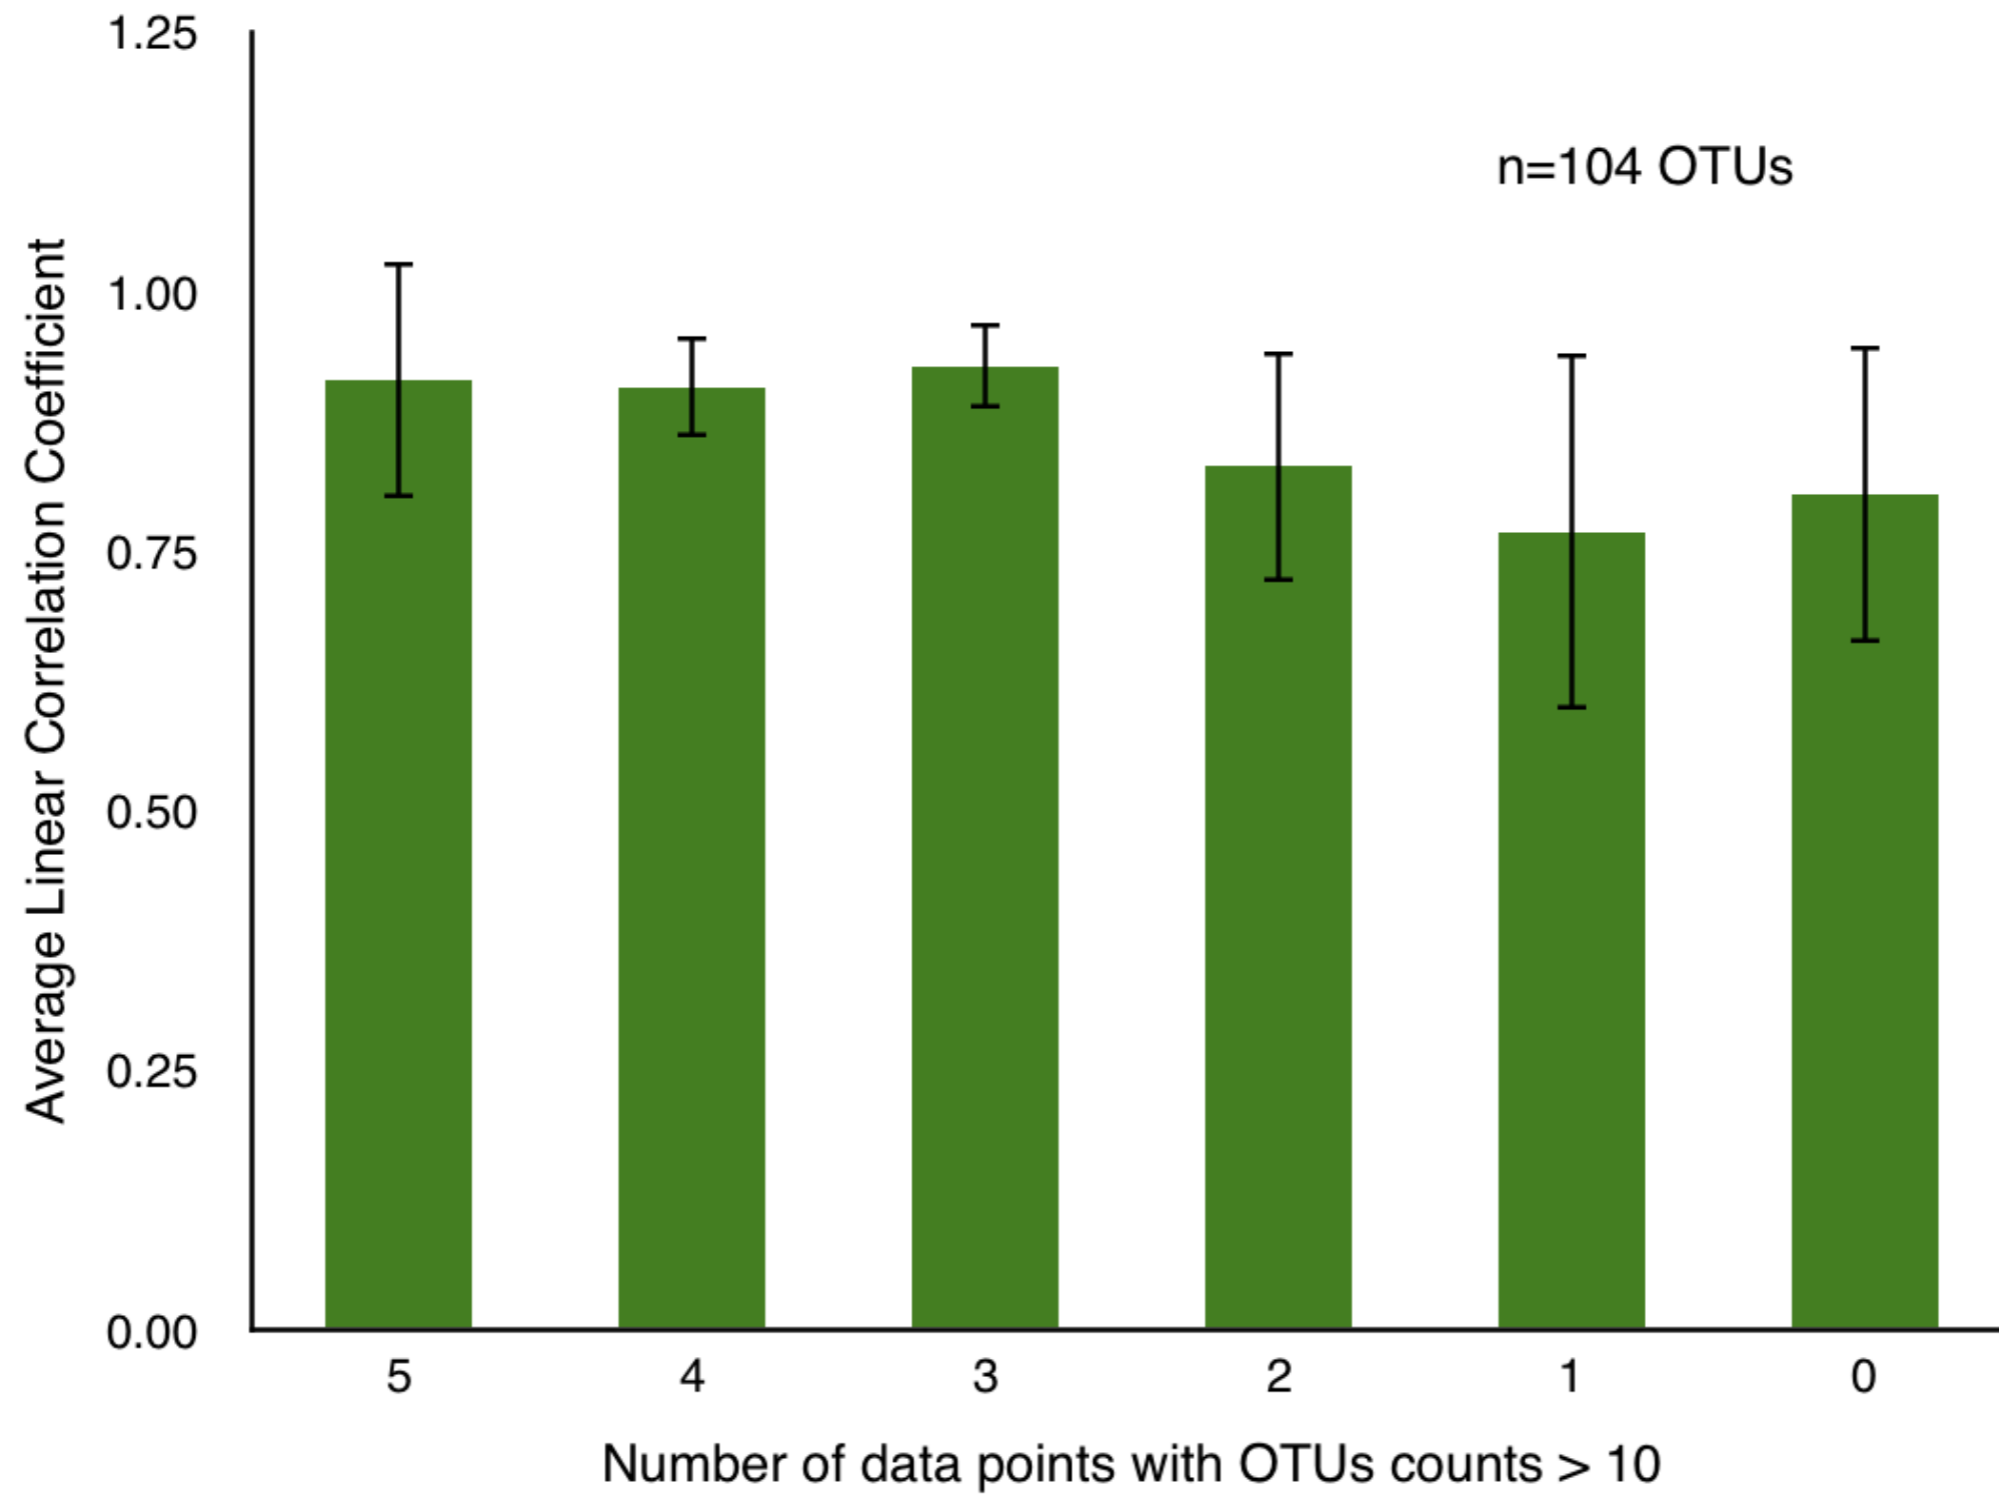

Samples are grouped into the number of data points with >10 OTUs. Error bars represent the standard deviation.

# Figure S8:

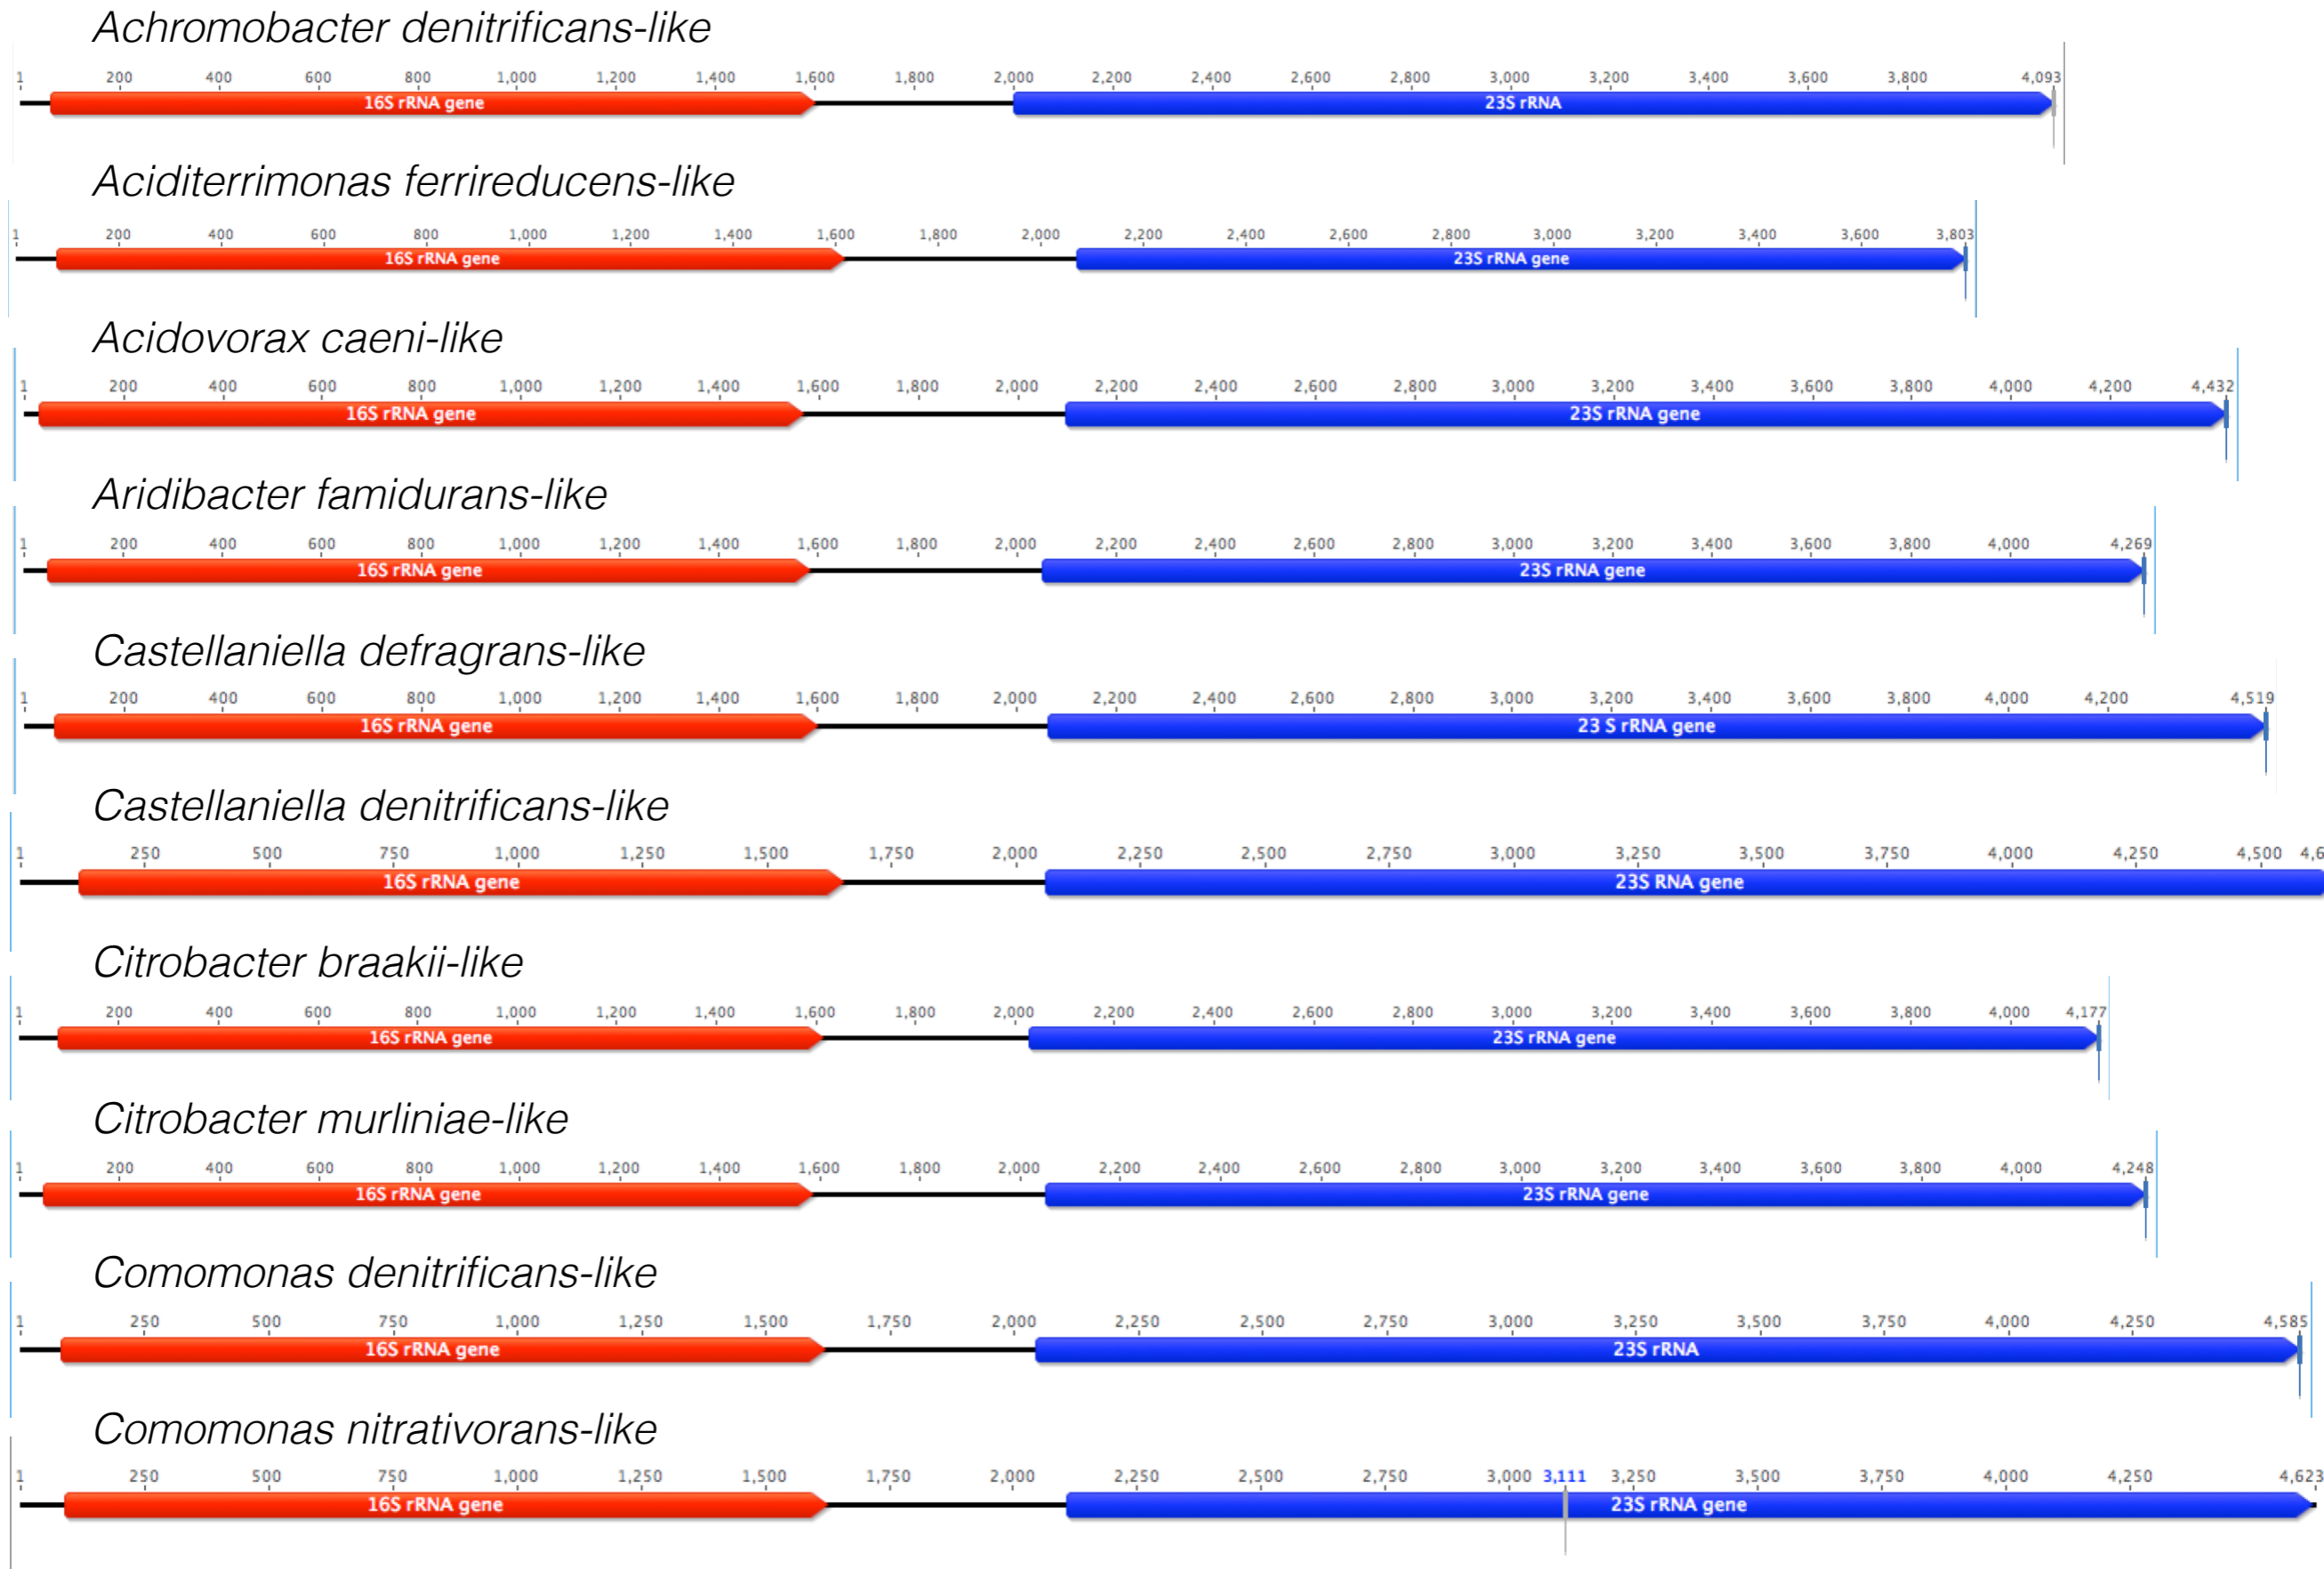

16S rRNA genes (red) and the 23S rRNA genes (blue) indicated.



Figure S9:

*Acidovorax wautersii*

|                  | Biological Rep 1 | Biological Rep 2 | Biological Rep 3 | Biological Rep 4 |
|------------------|------------------|------------------|------------------|------------------|
| Biological Rep 1 | -                | 100              | 100              | 100              |
| Biological Rep 2 | 100              | -                | 100              | 100              |
| Biological Rep 3 | 100              | 100              | -                | 100              |
| Biological Rep 4 | 100              | 100              | 100              | -                |

*Comomonas nitrativorans*

|                  | Biological Rep 1 | Biological Rep 2 | Biological Rep 3 | Biological Rep 4 |
|------------------|------------------|------------------|------------------|------------------|
| Biological Rep 1 | -                | 100              | 100              | 100              |
| Biological Rep 2 | 100              | -                | 100              | 100              |
| Biological Rep 3 | 100              | 100              | -                | 100              |
| Biological Rep 4 | 100              | 100              | 100              | -                |

*Stenotrophomonas rhizophilia*

|                  | Biological Rep 1 | Biological Rep 2 | Biological Rep 3 | Biological Rep 4 |
|------------------|------------------|------------------|------------------|------------------|
| Biological Rep 1 | -                | 100              | 100              | 100              |
| Biological Rep 2 | 100              | -                | 100              | 100              |
| Biological Rep 3 | 100              | 100              | -                | 100              |
| Biological Rep 4 | 100              | 100              | 100              | -                |

DNA from each biological replicate was amplified, sequenced, and processed separately to assess errors from consensus building. All 16S rRNA gene consensus sequences from the replicates were found to be identical.

Figure S10:

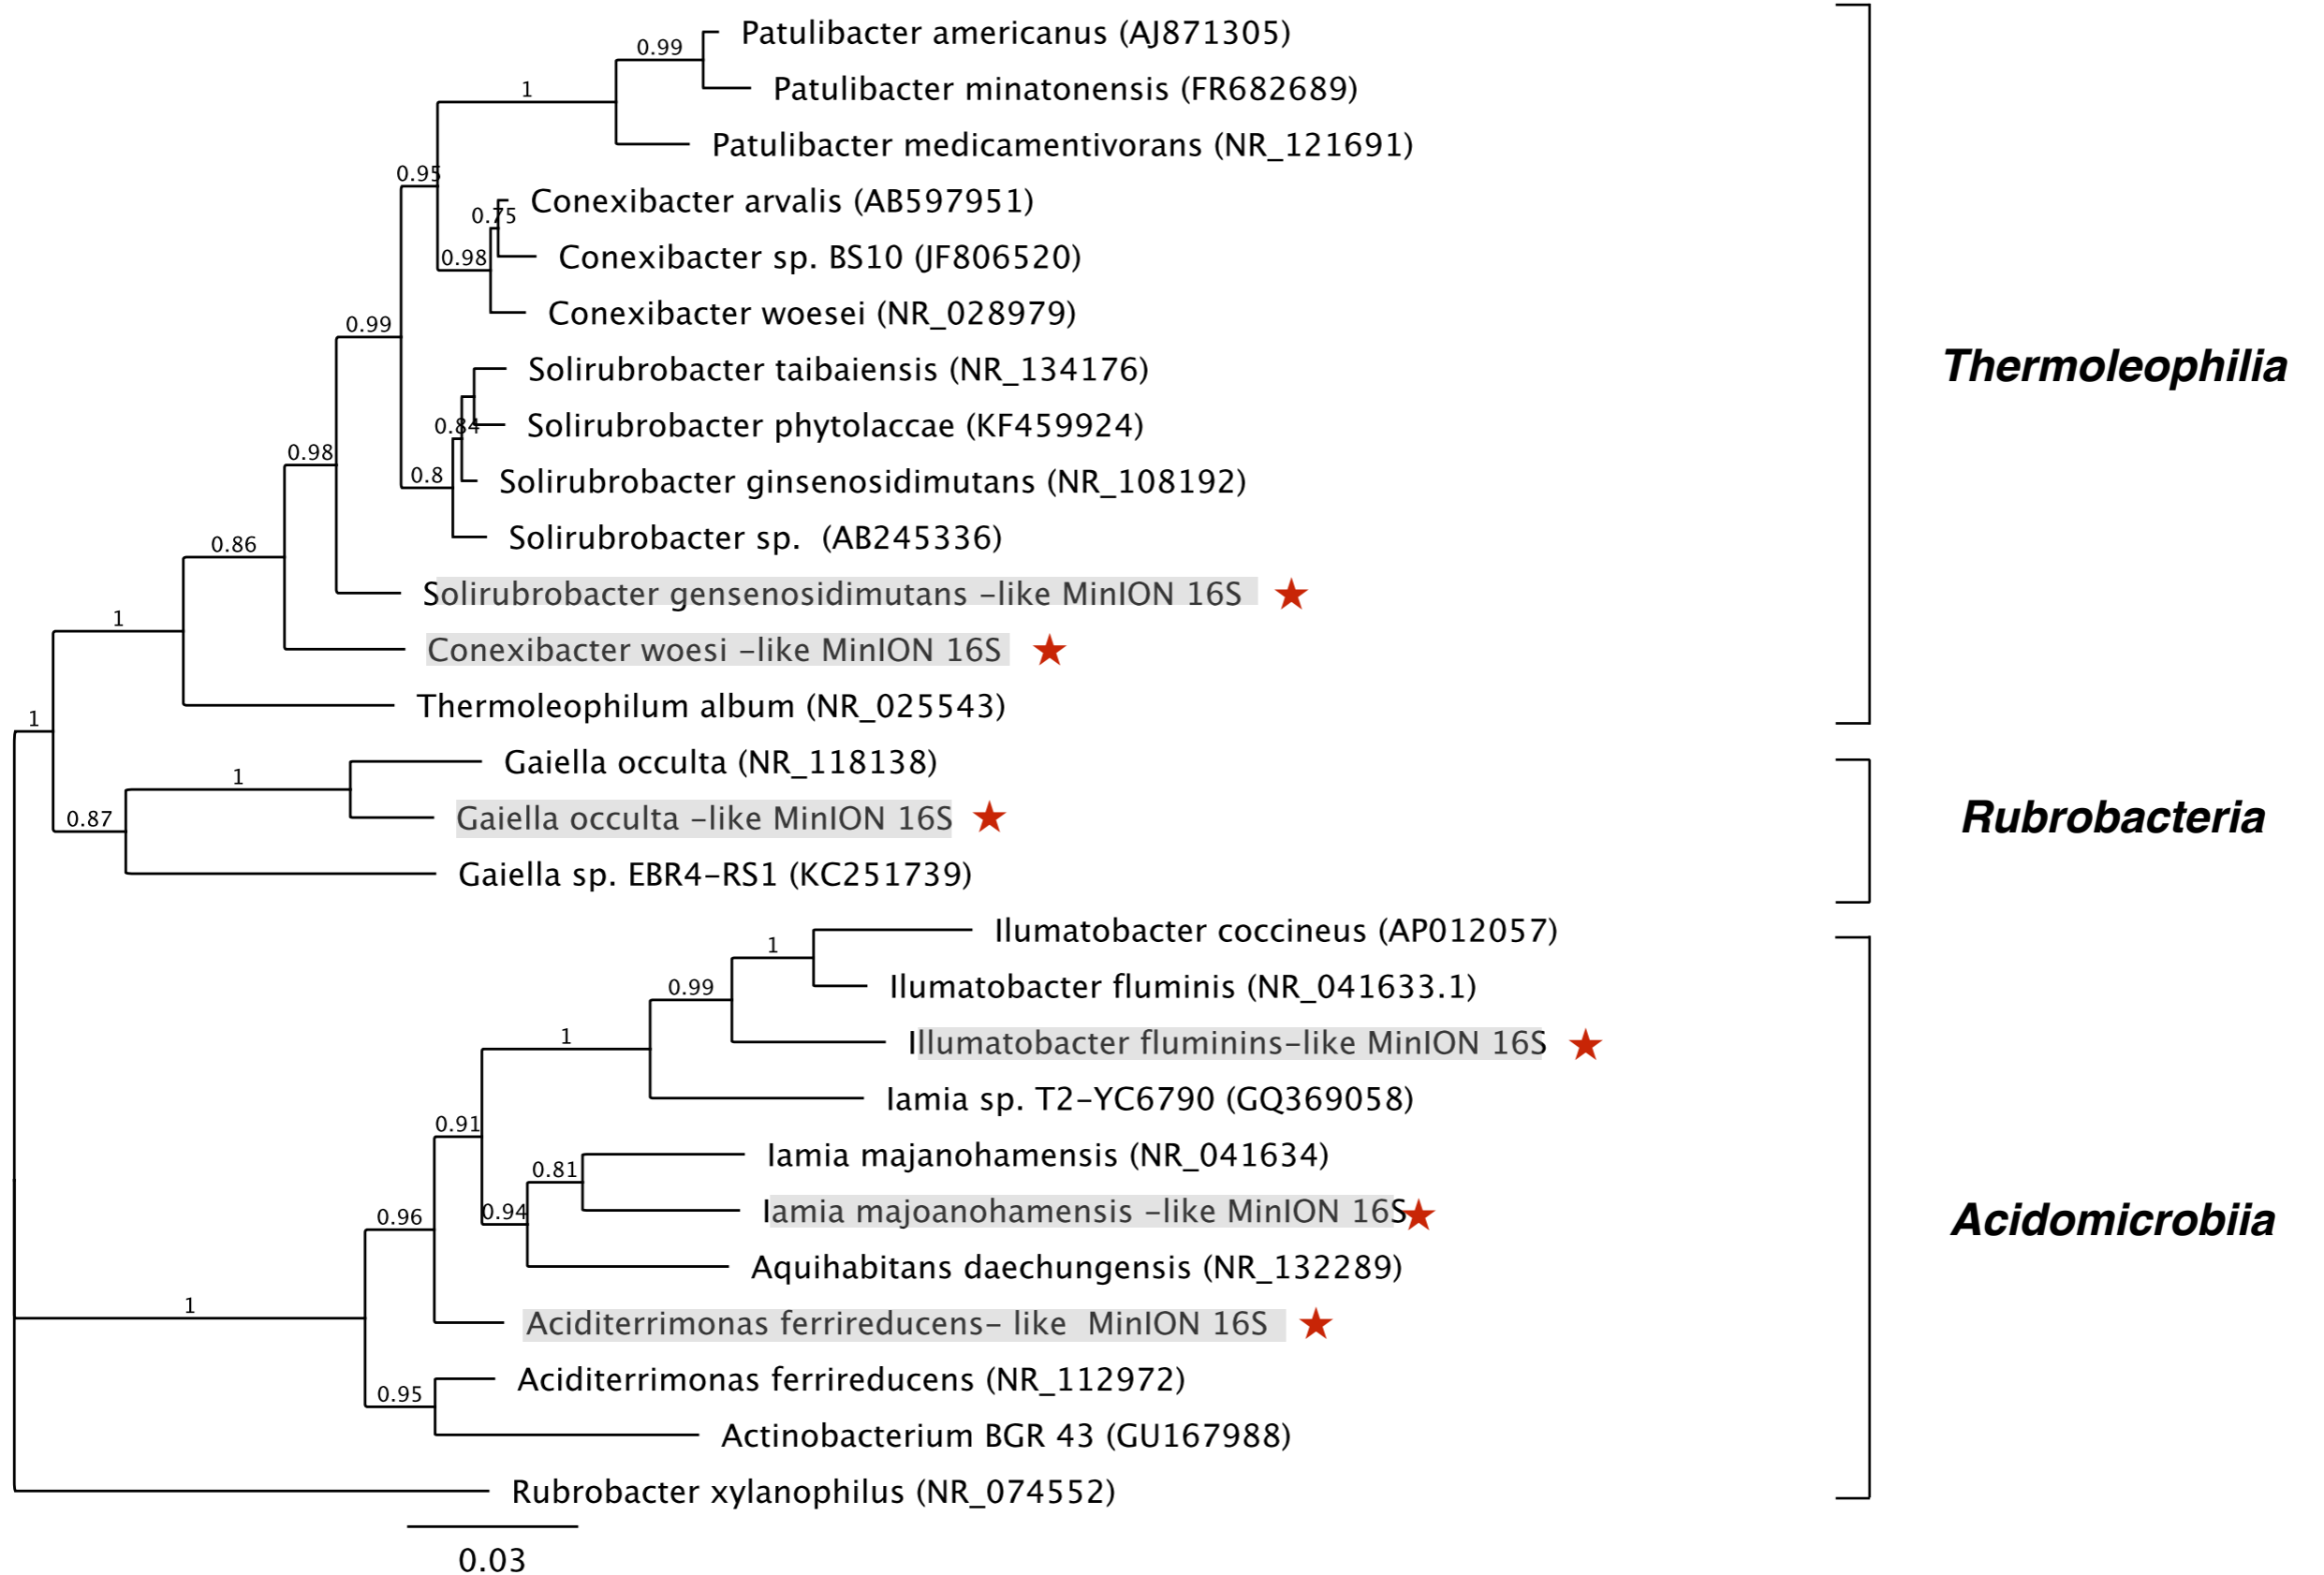

Tree reconstructions using FastTree for 1252 unambiguously aligned bases.

The MinION sequences are indicated by boxes and stars.

Figure S11:

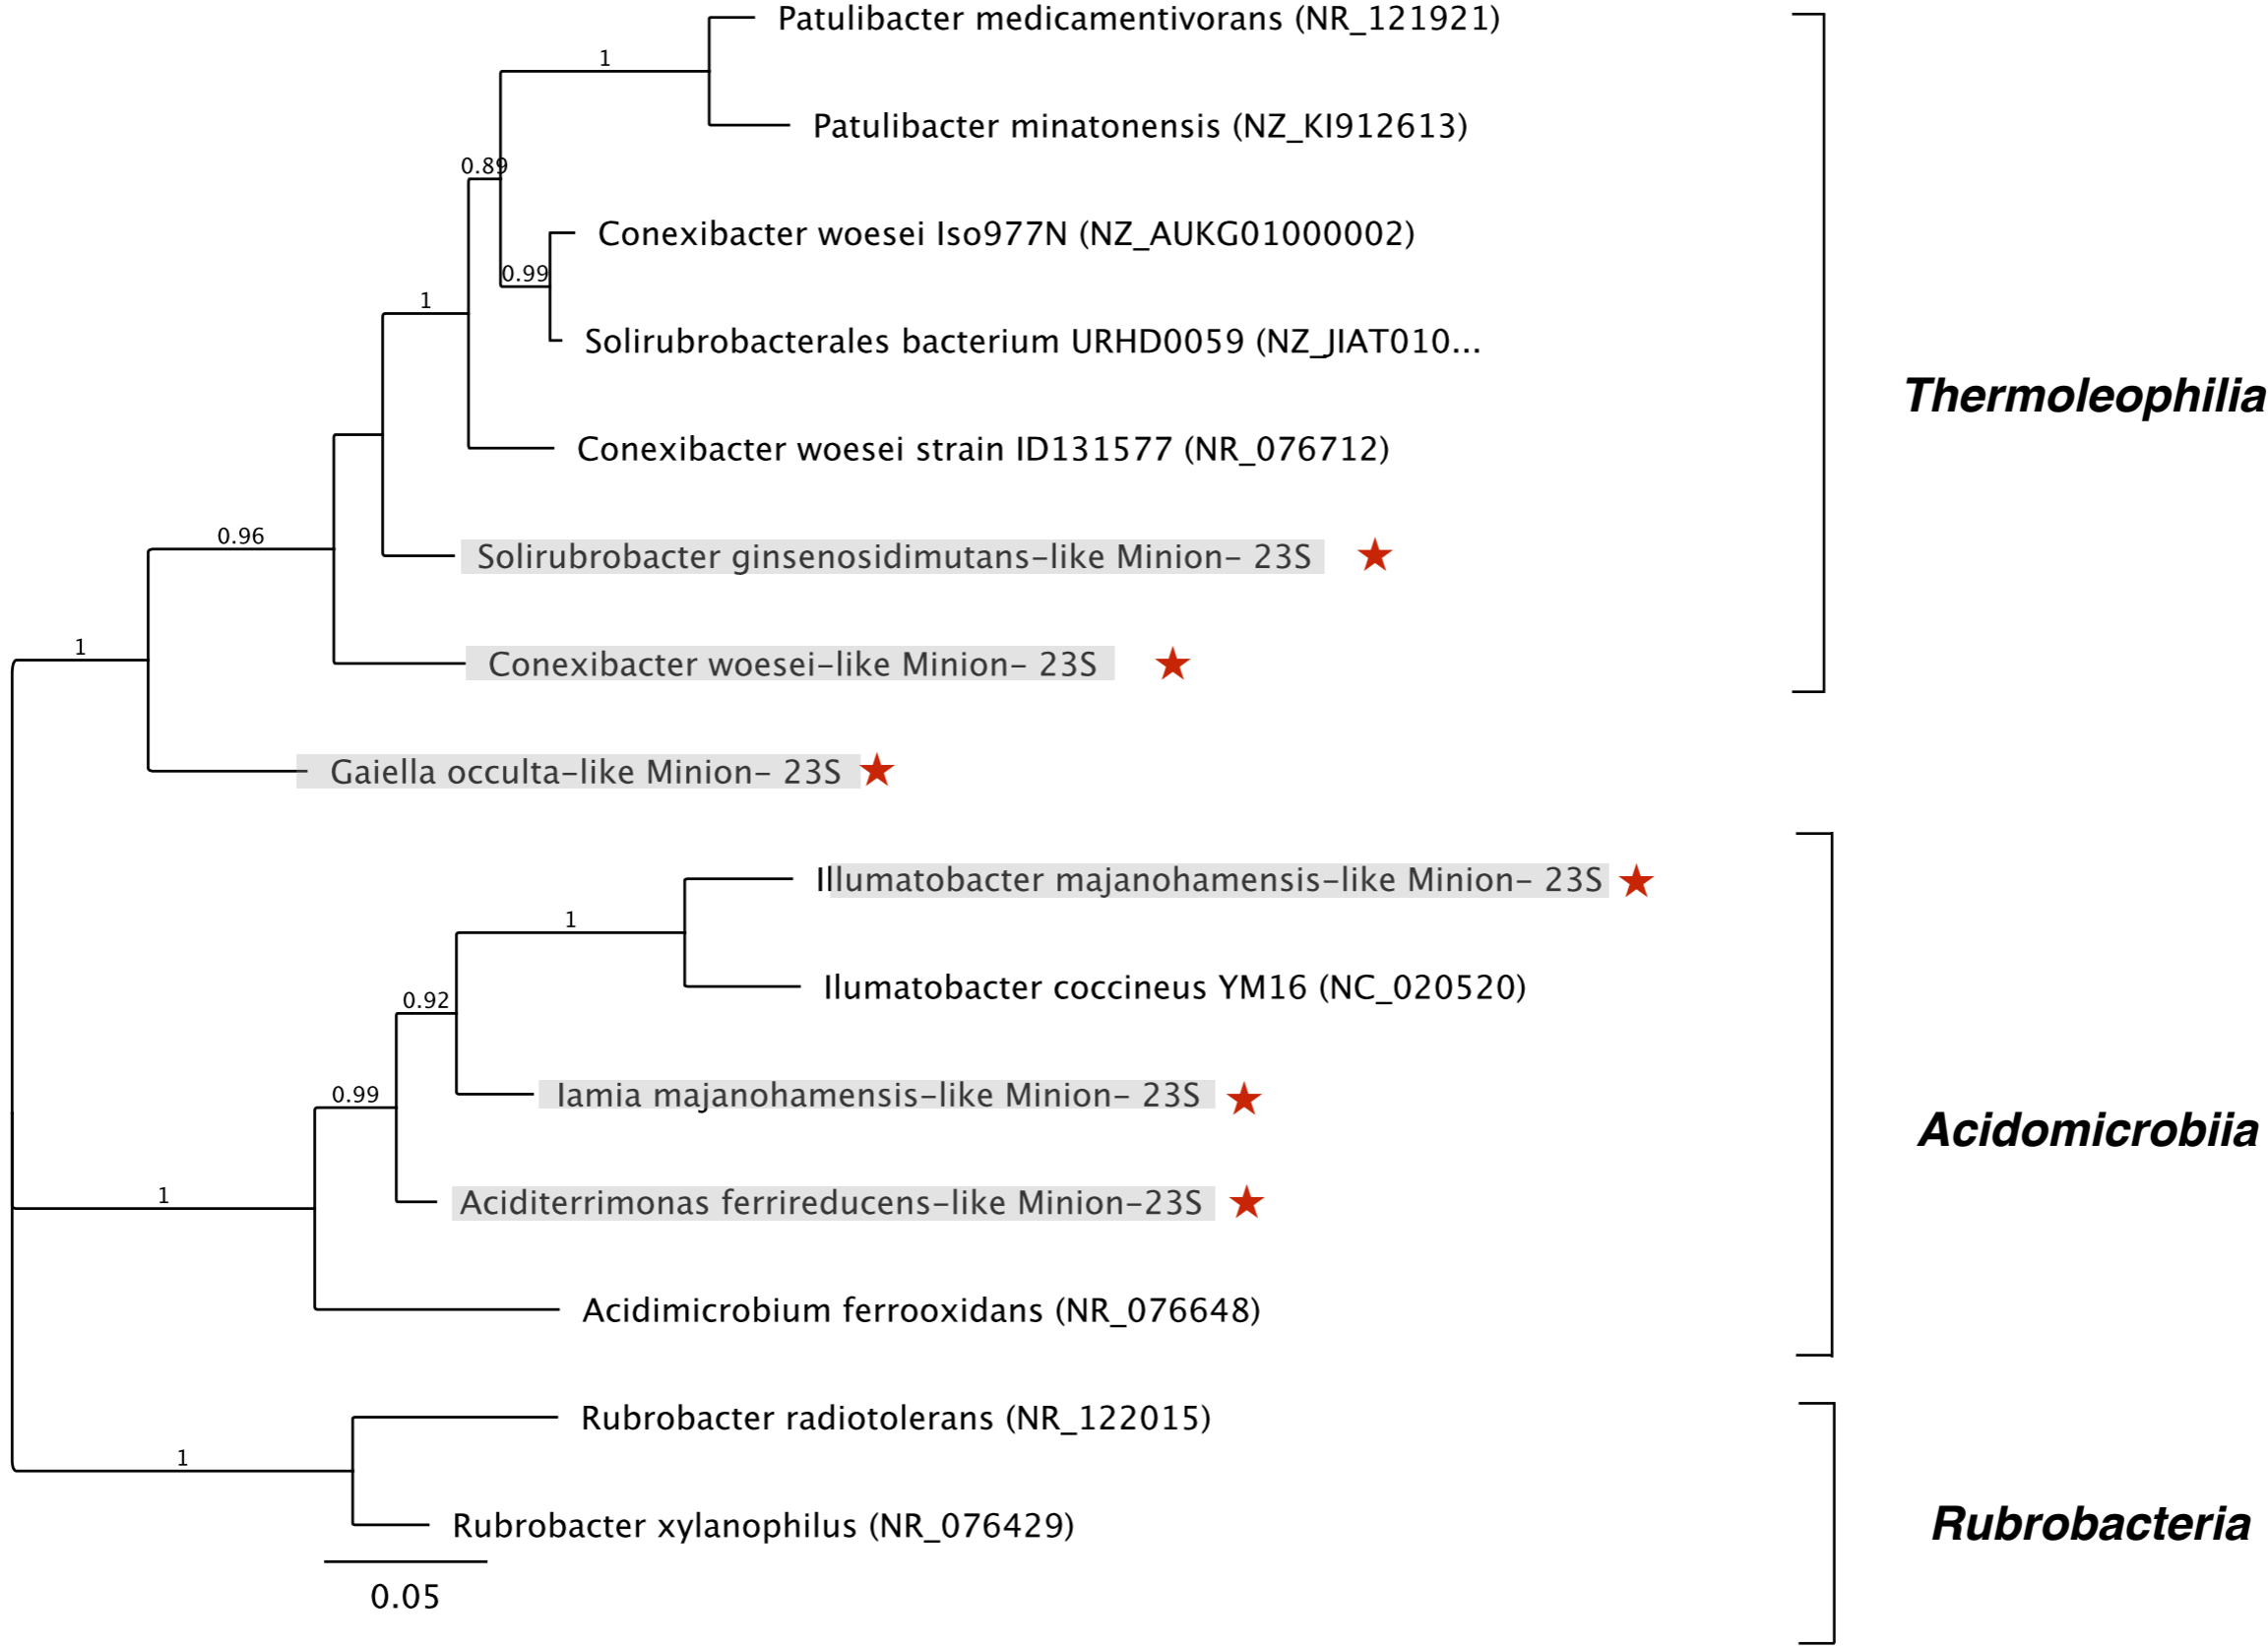

Tree reconstructions using FastTree for 1553 unambiguously aligned bases.  
The MinION sequences are indicated by boxes and stars.

Figure S12:

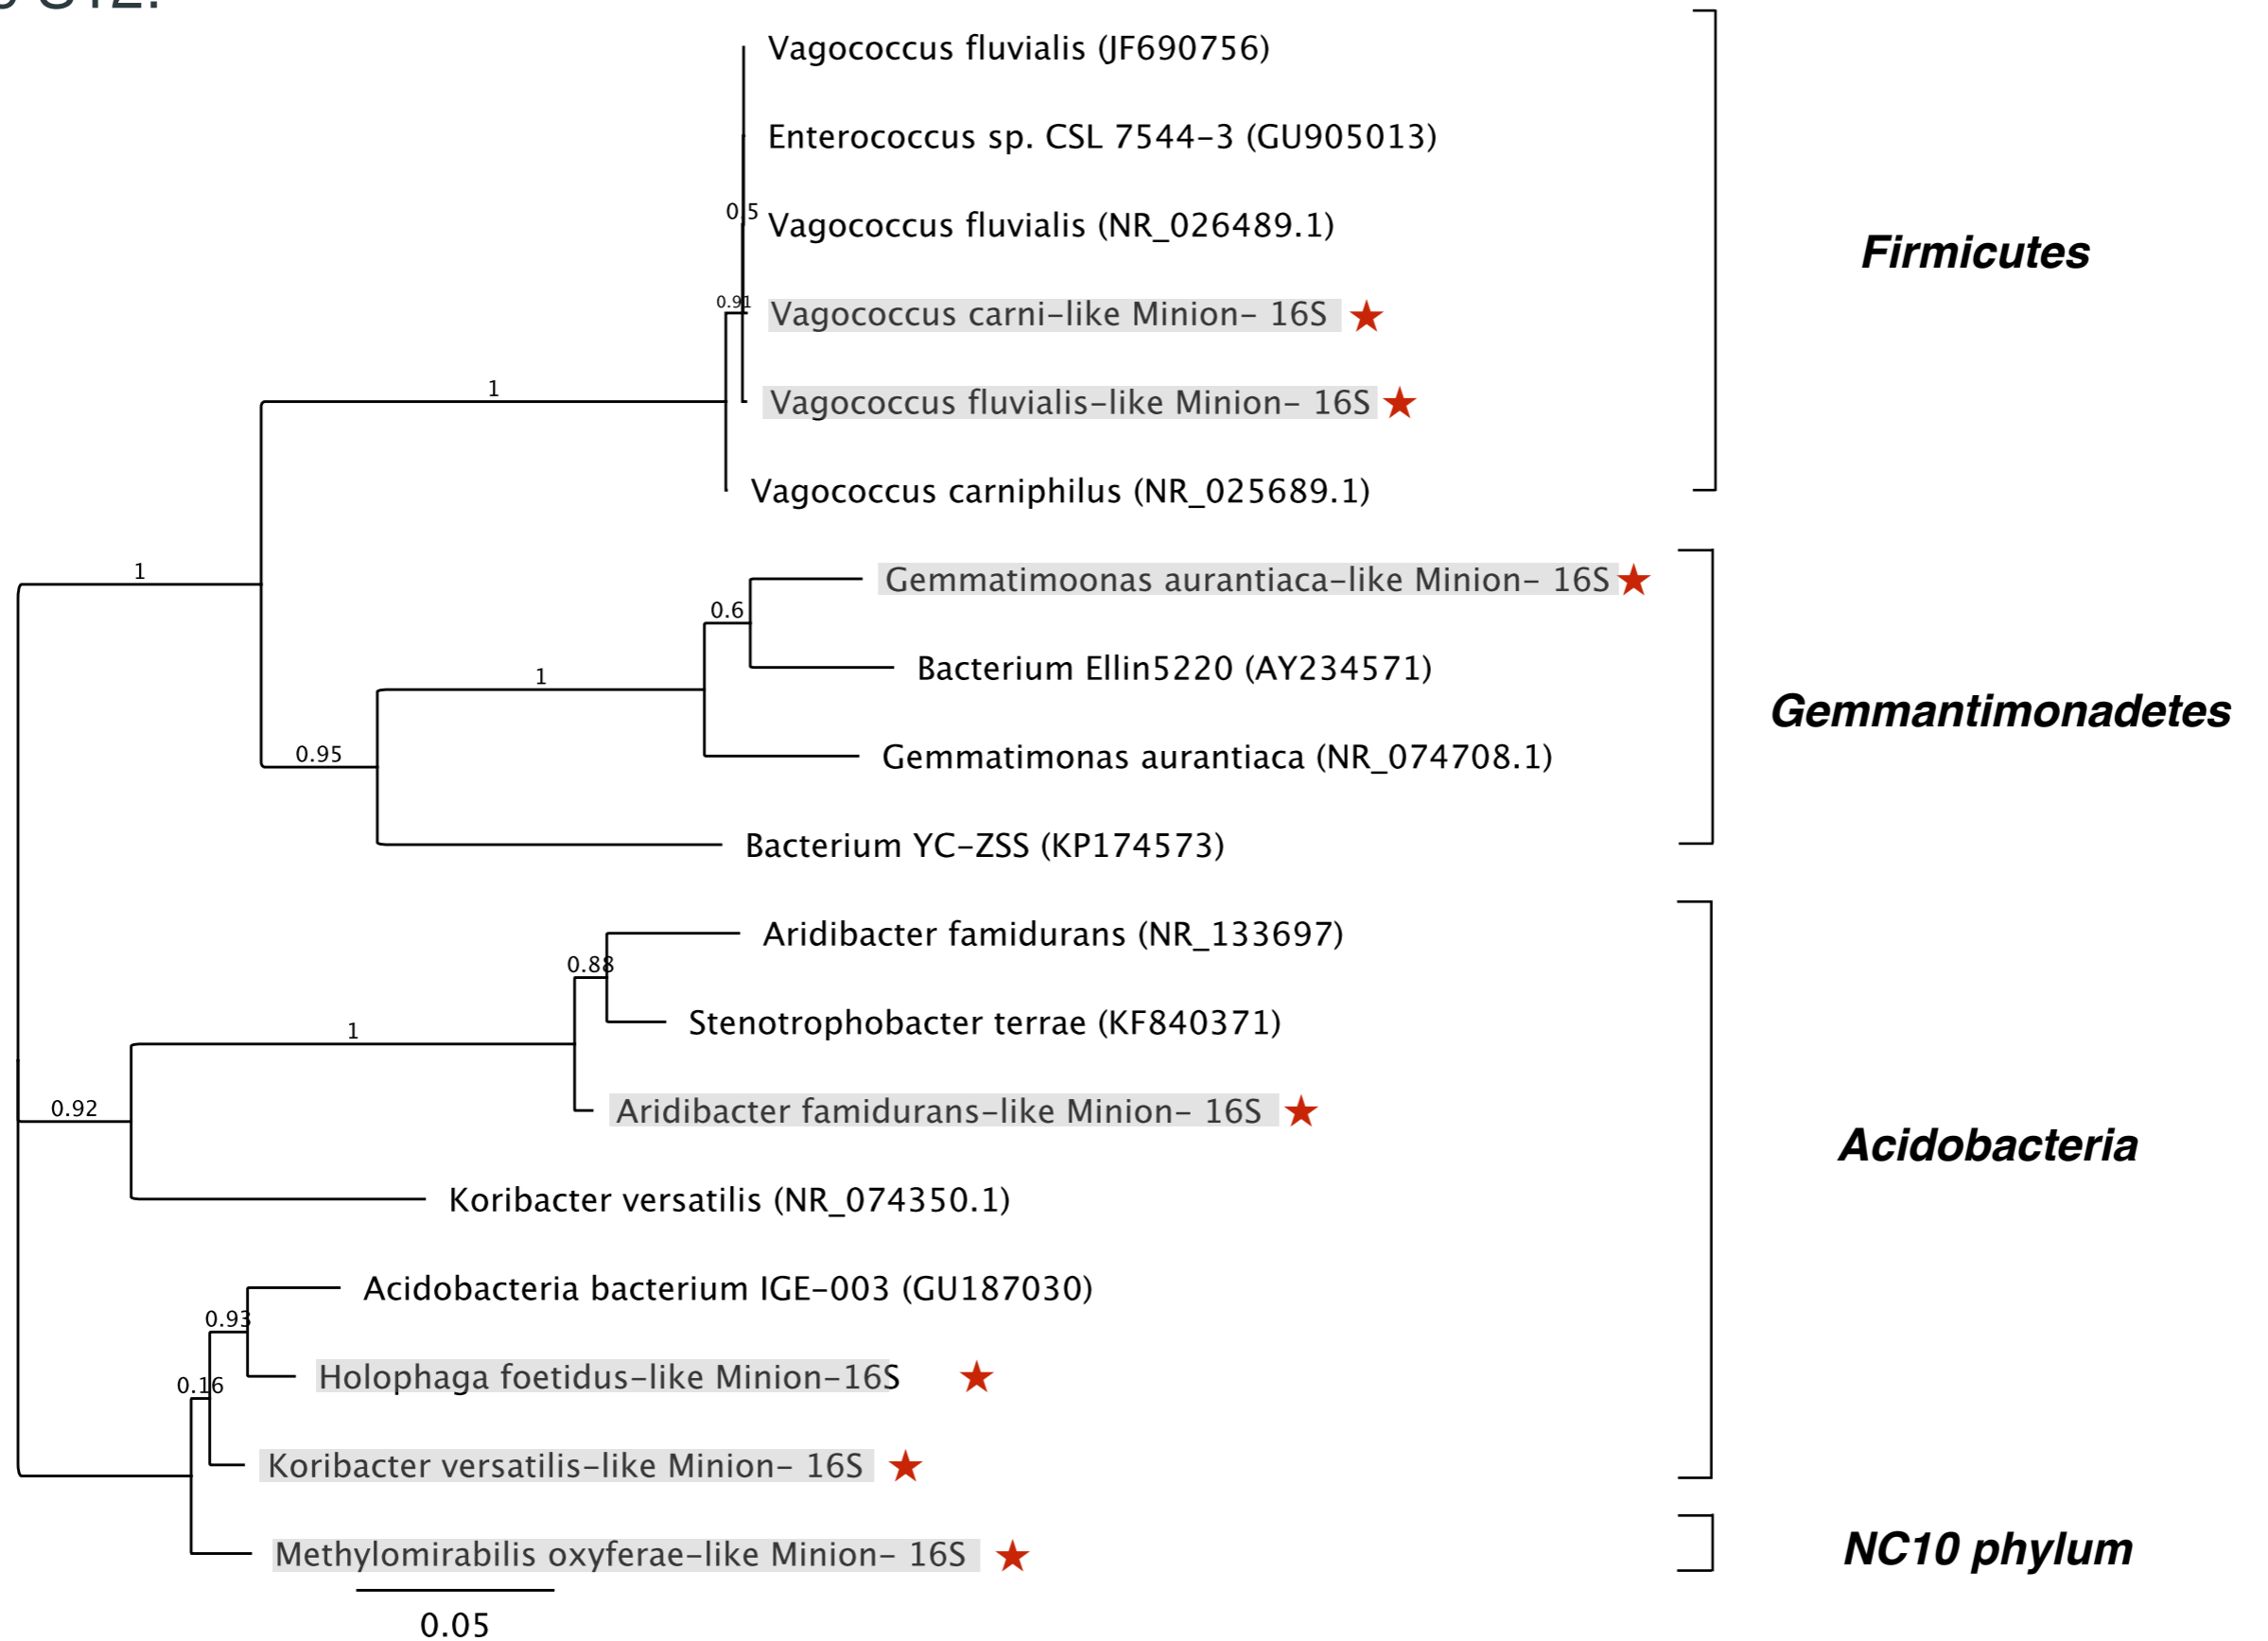

Tree reconstructions using FastTree for 1181 unambiguously aligned bases.

The MinION sequences are indicated by boxes and stars.

Figure S13:

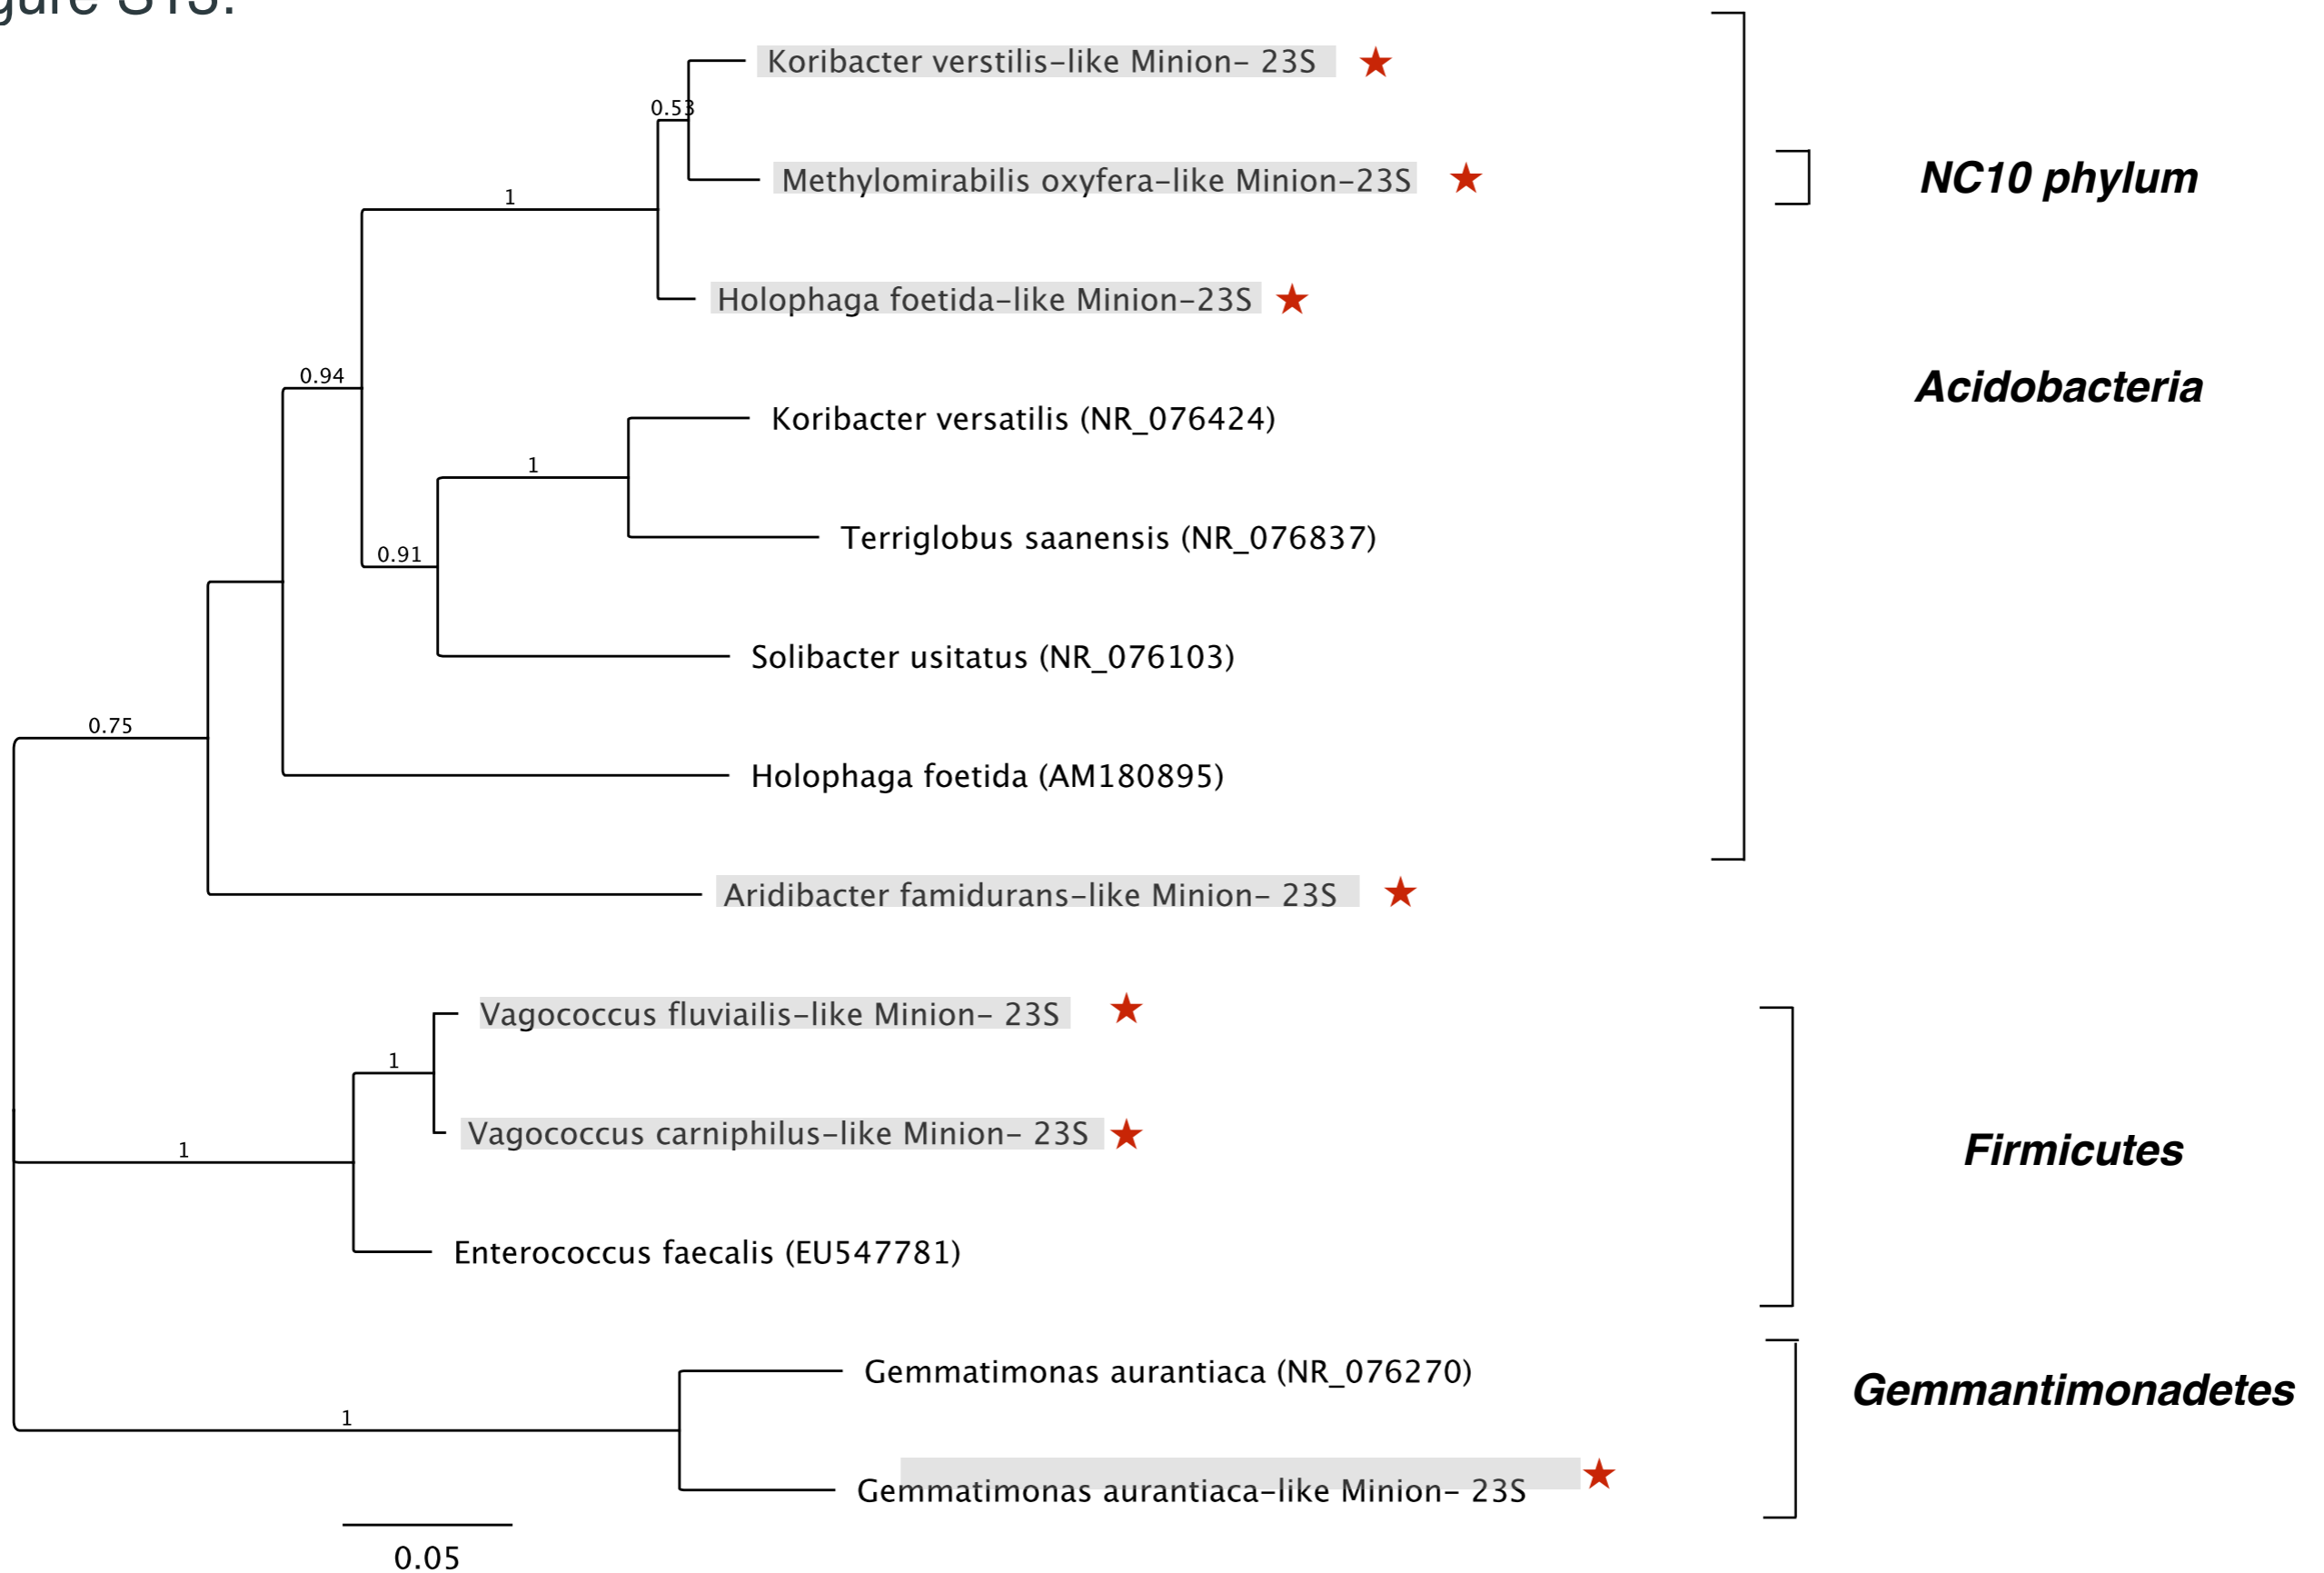

Tree reconstructions using FastTree for 1518 unambiguously aligned bases.

The MinION sequences are indicated by boxes and stars.

Figure S14:

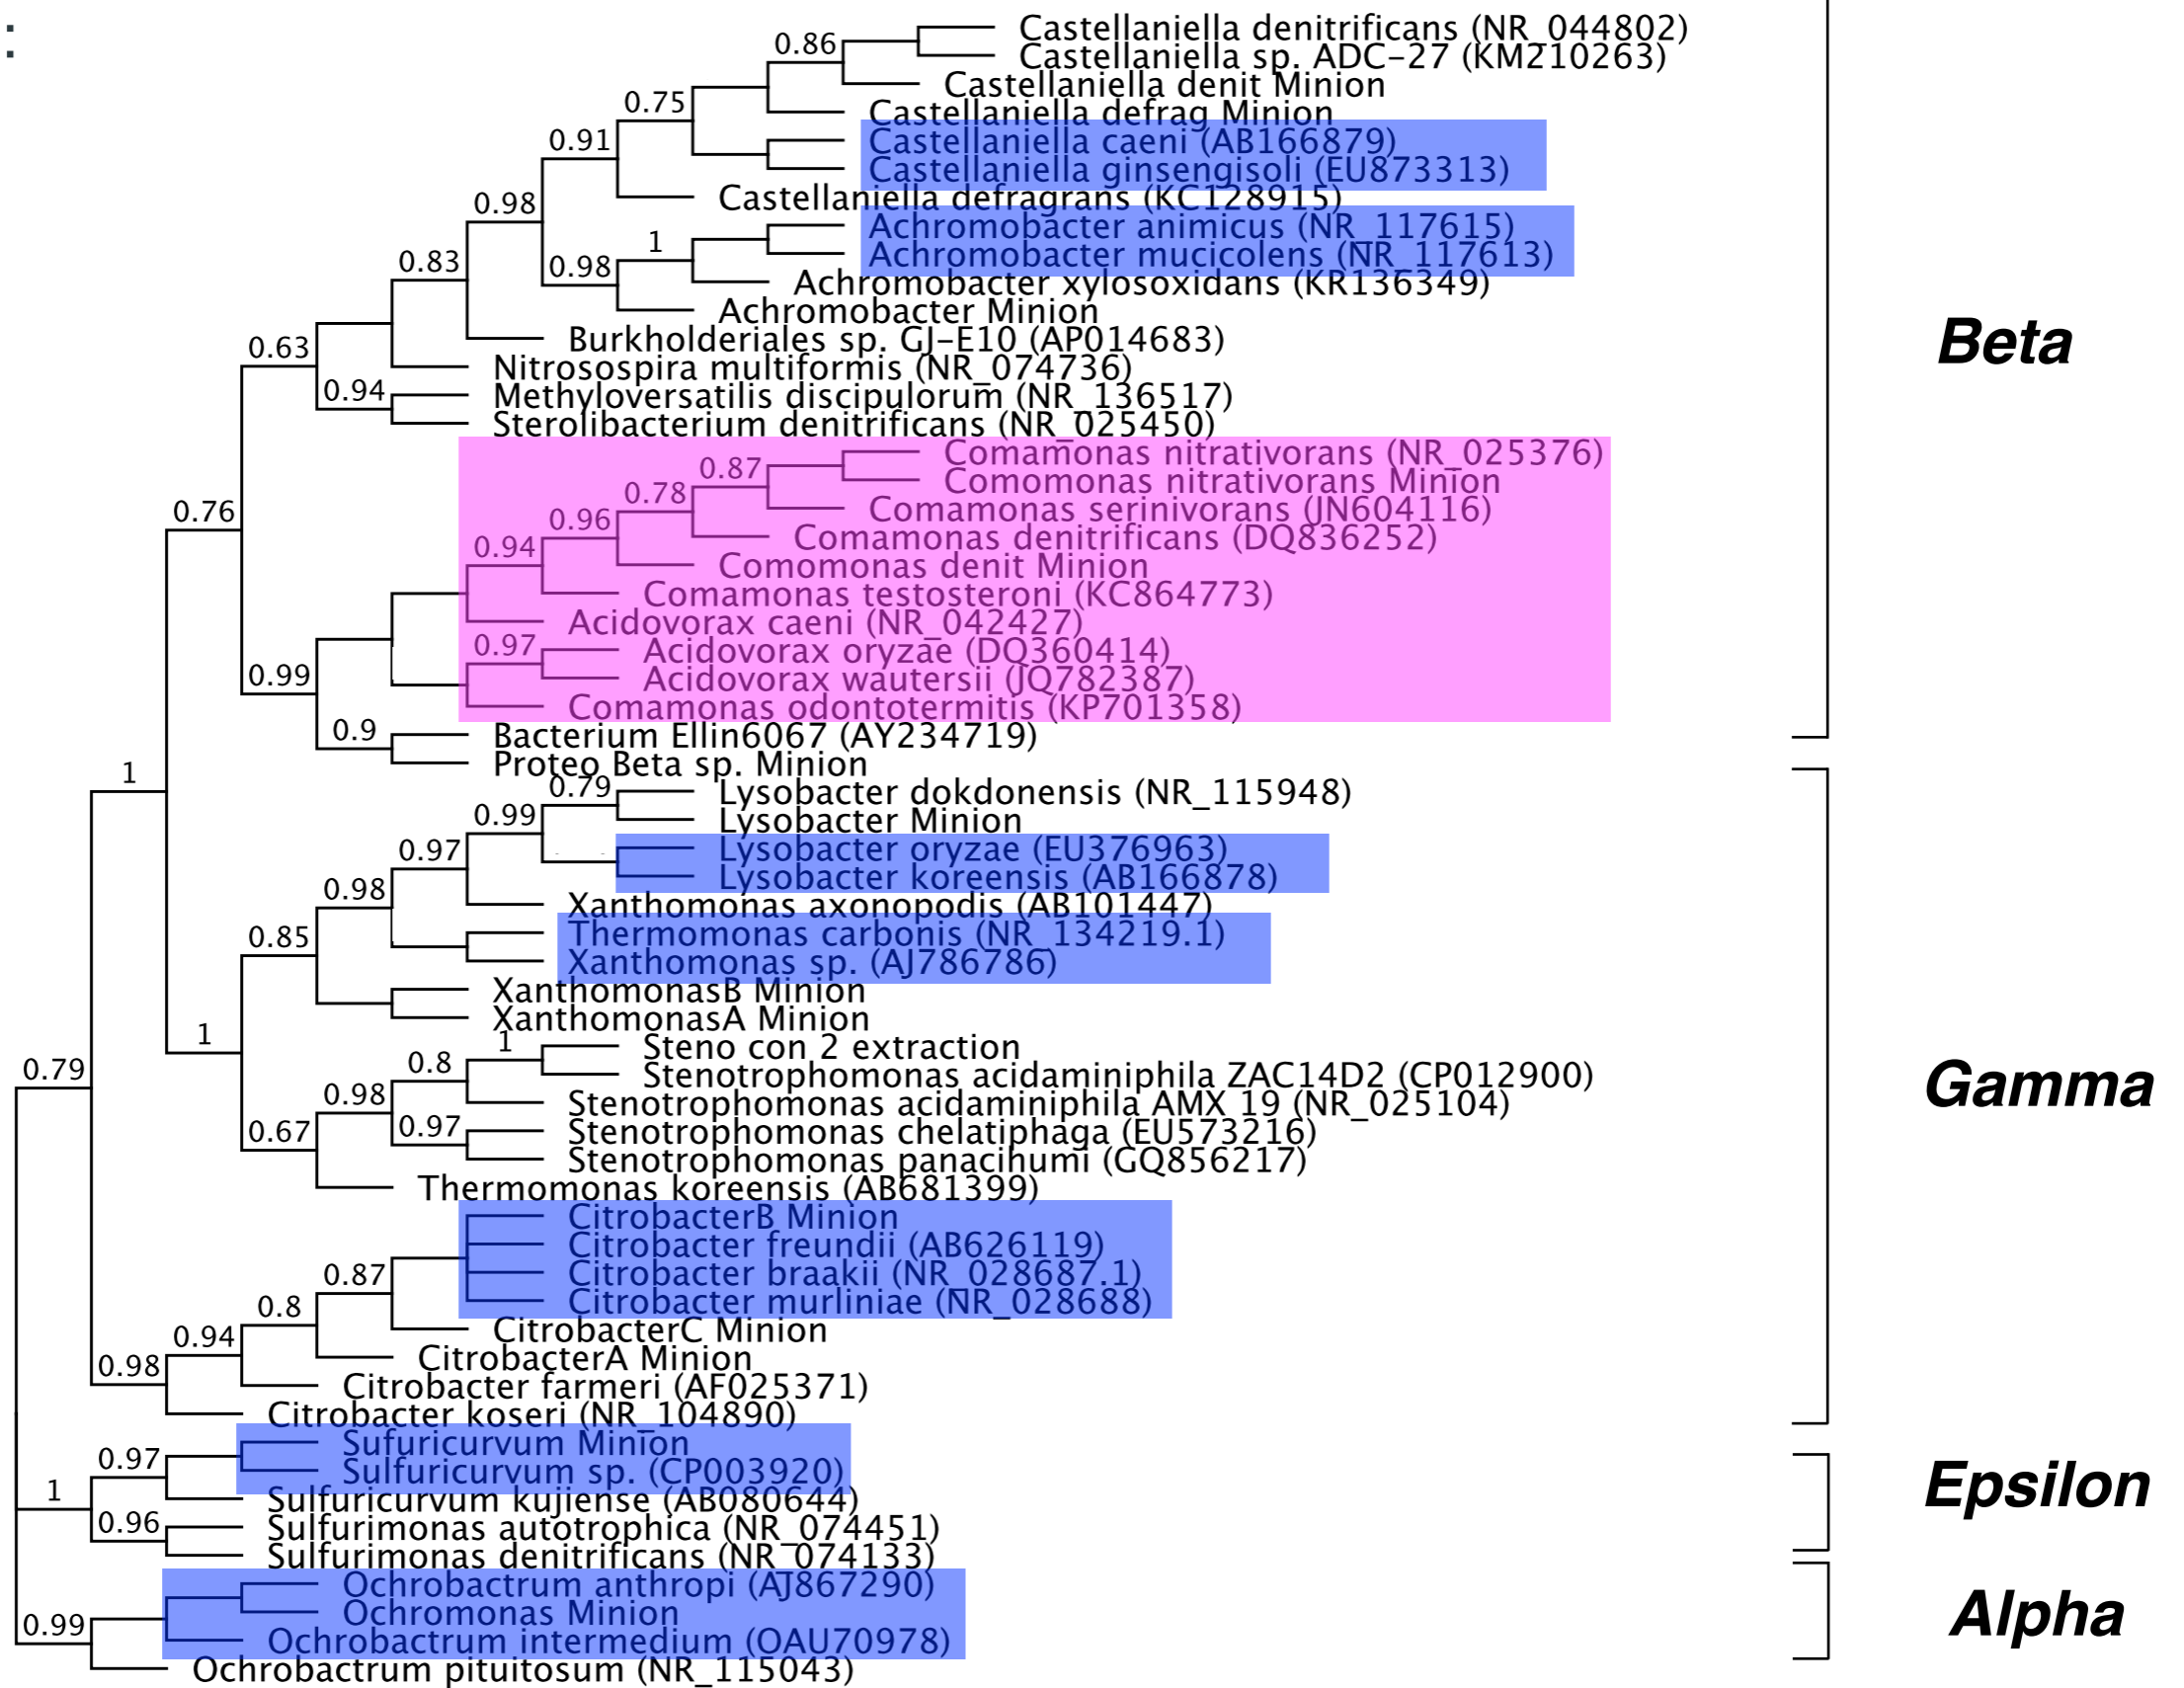

The portion of the tree not supported by bootstrap analysis is highlighted in blue while the portion of the tree not resolving bacterial genera is highlighted in pink.

Figure S15:

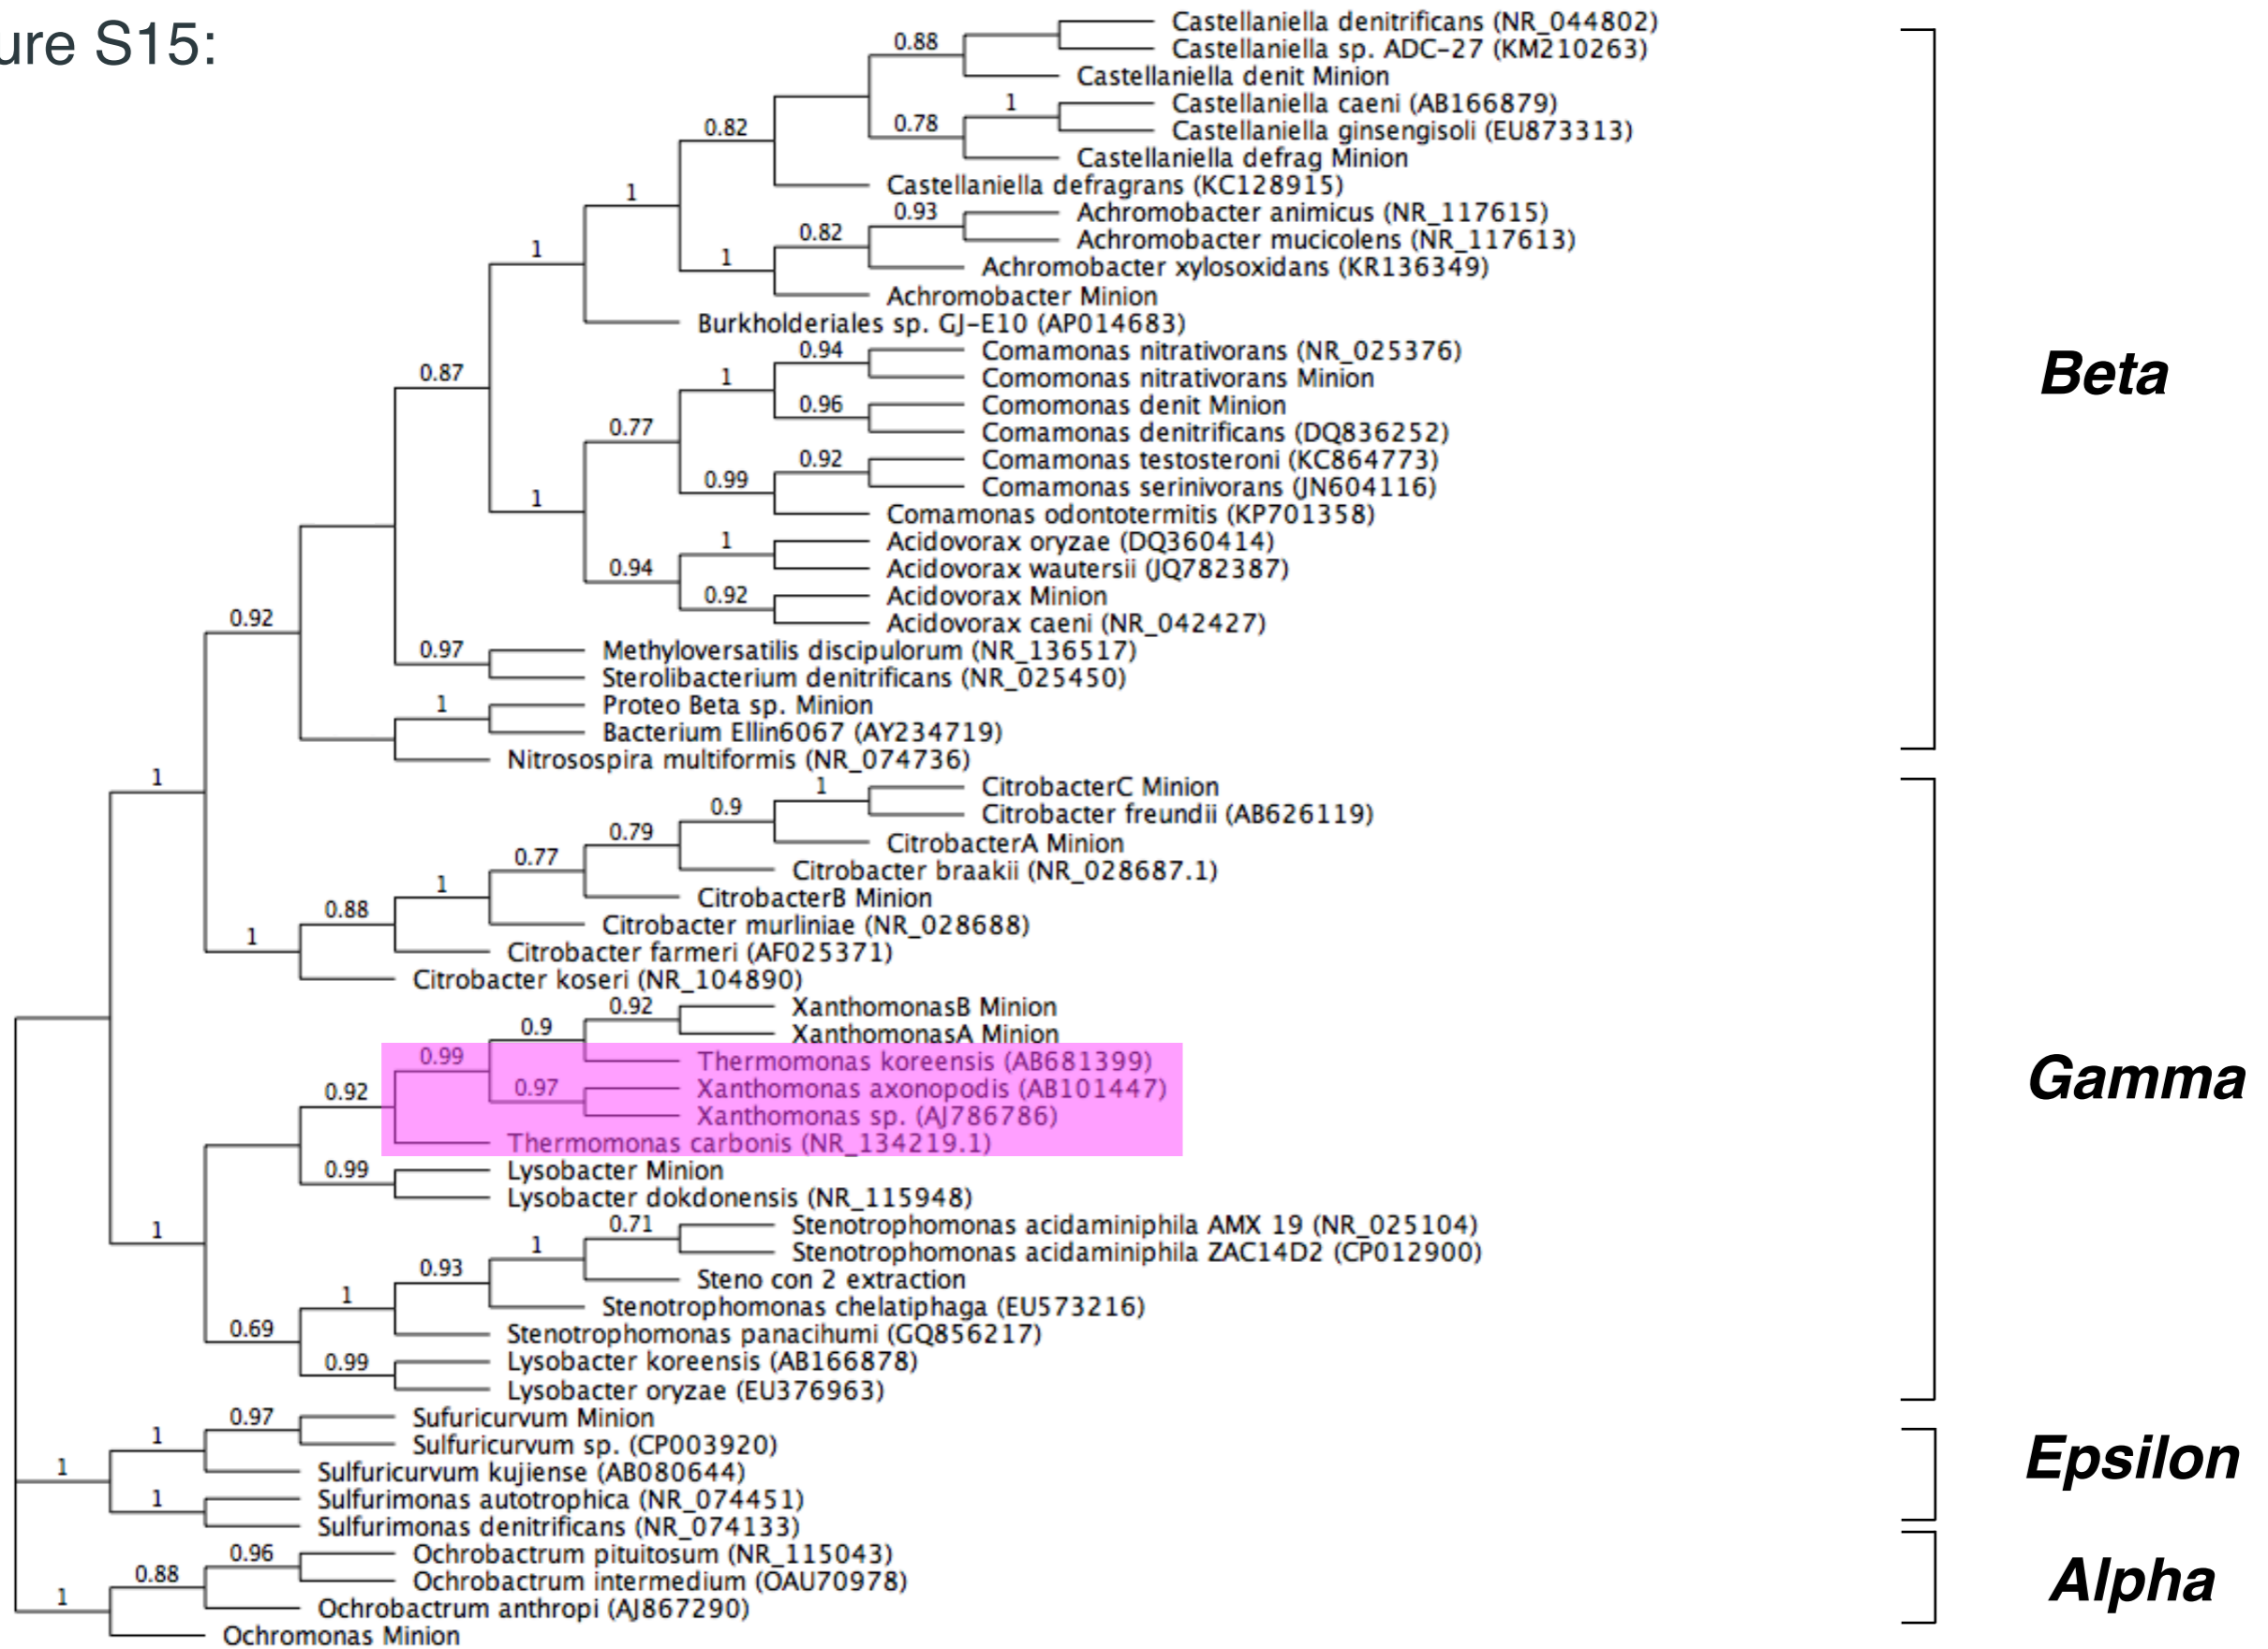

The portion of the tree not resolving bacterial genera is highlighted in pink.

Figure S16:

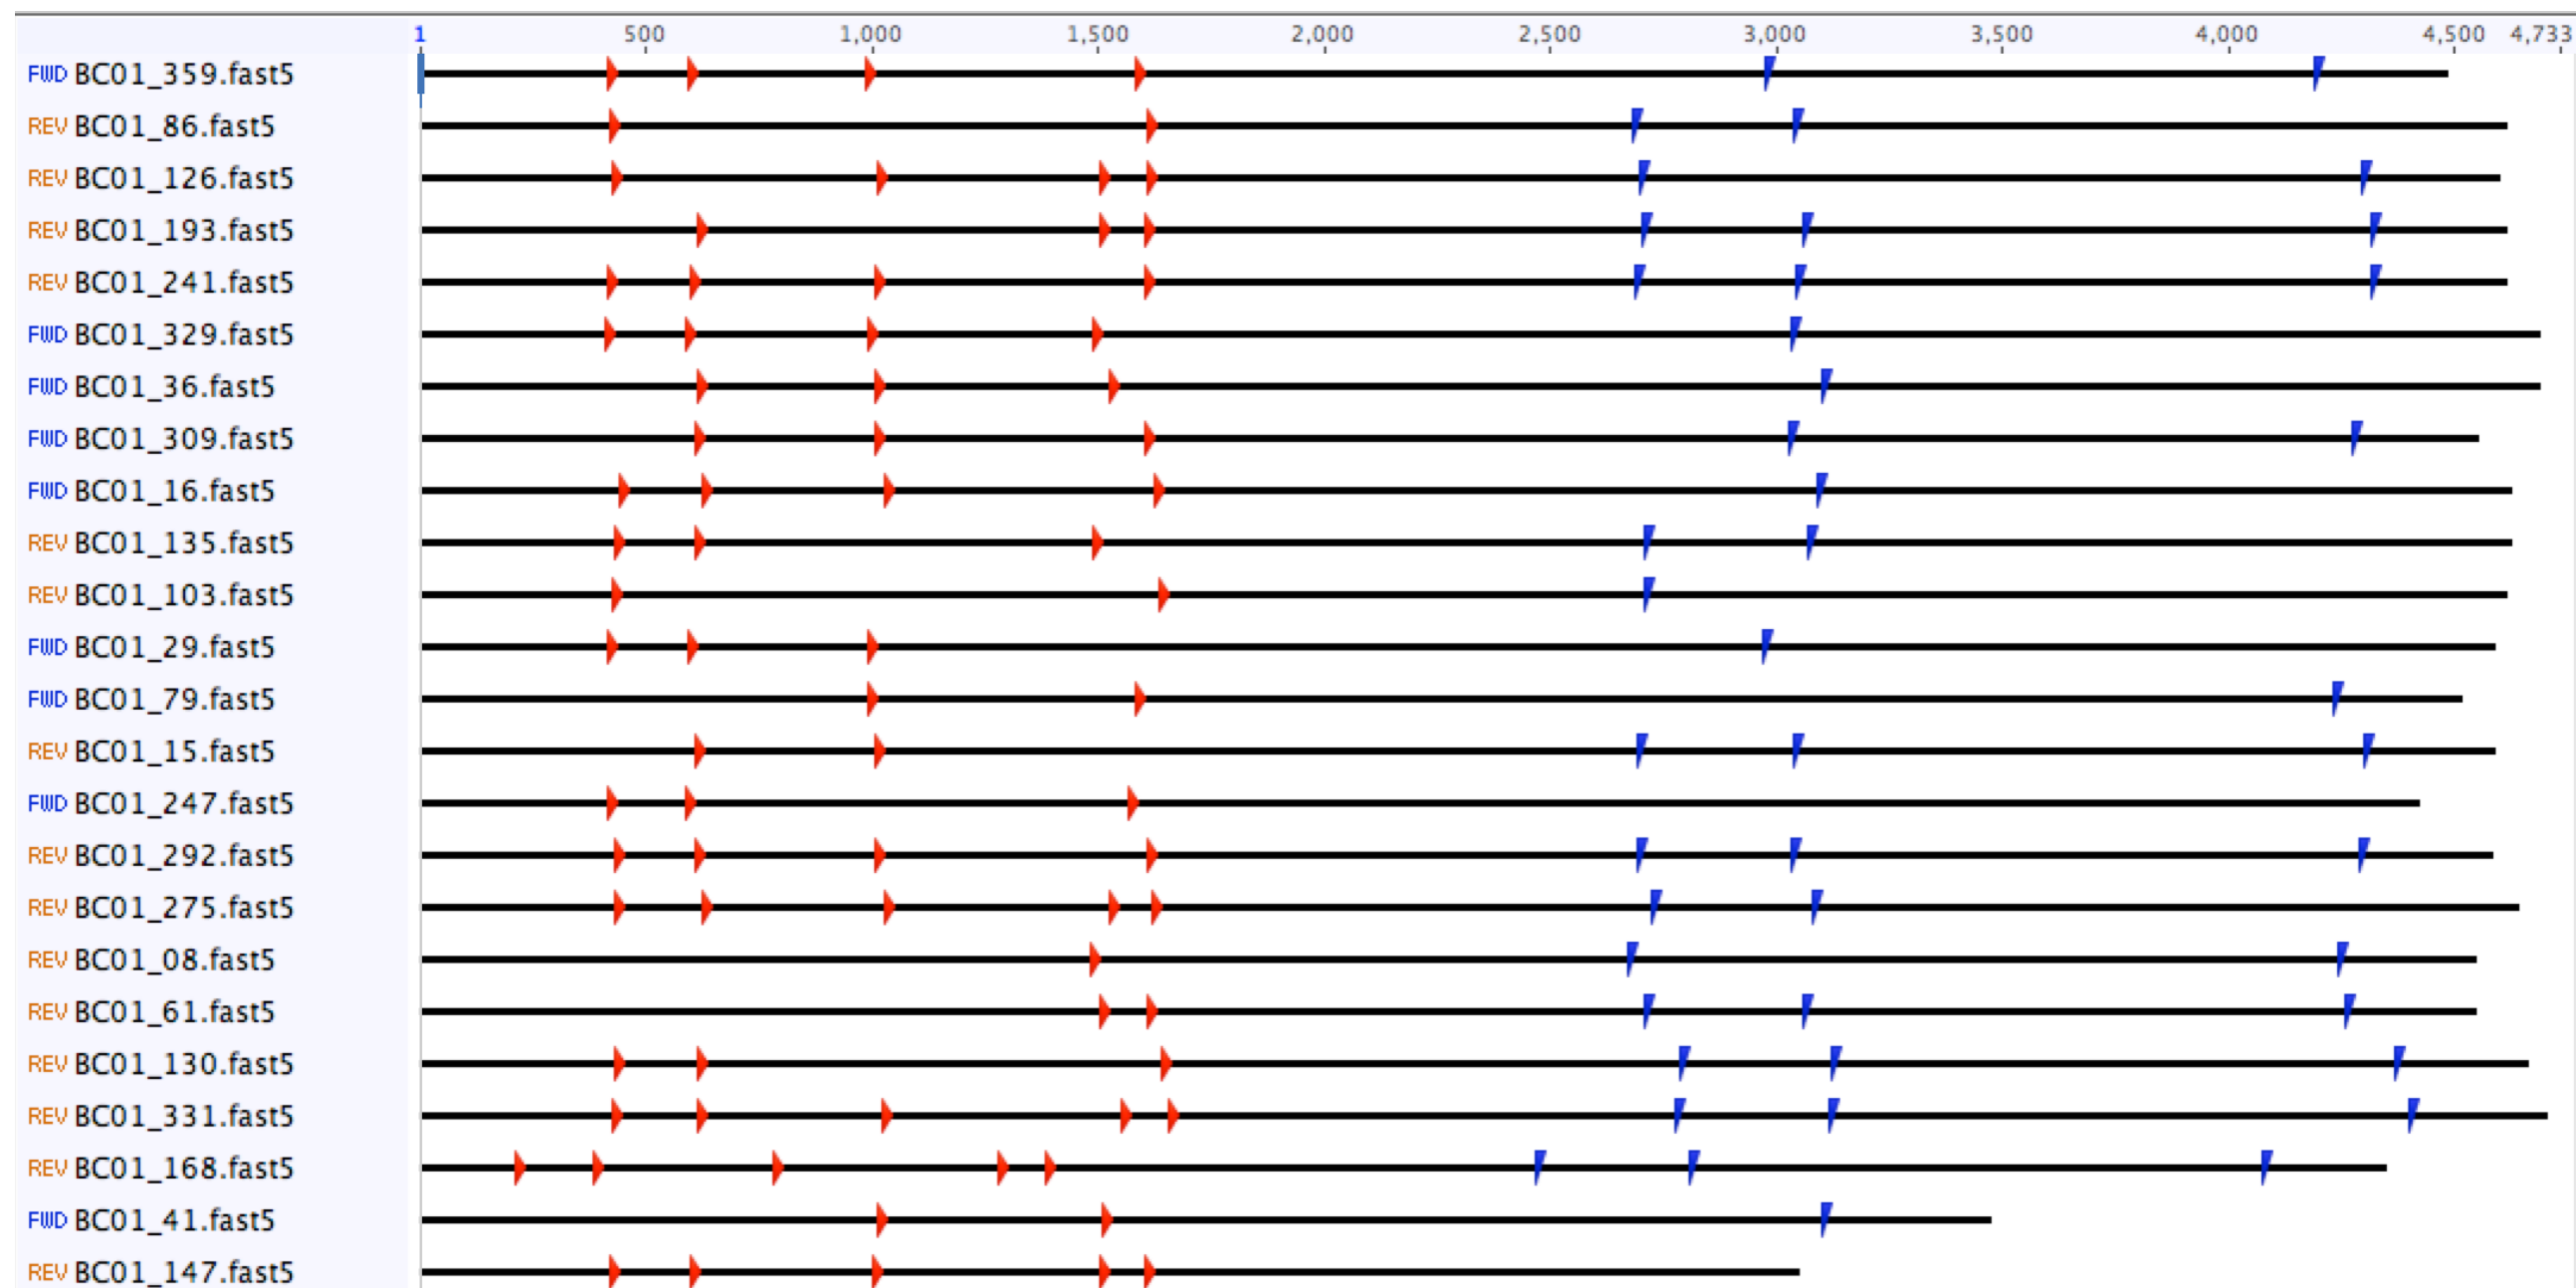

Universal 16S (red) and 23S (blue) rRNA gene priming sets are indicated.

Short sequences (<4000 bp) and those without priming sites are removed during QA/QC.



Table S1:

|                    | <b>2D</b> | <b>1D</b> | <b>Totals</b> |
|--------------------|-----------|-----------|---------------|
| <b>Total Reads</b> | 32991     | 56866     | 8.99E+04      |
| <b>Total bp</b>    | 140533277 | 212346402 | 3.53E+08      |
| <b>Mean</b>        | 4238      | 3698      |               |
| <b>Median</b>      | 4393      | 4090      |               |
| <b>Min</b>         | 828       | 13        |               |
| <b>Max</b>         | 8478      | 169741    |               |
| <b>N25</b>         | 4622      | 4767      |               |
| <b>N50</b>         | 4433      | 4383      |               |
| <b>N75</b>         | 4222      | 3811      |               |

Table S2

| Query           | Description                                                                                         | Name  | Grade | Query coverage | % Pairwise Identity |
|-----------------|-----------------------------------------------------------------------------------------------------|-------|-------|----------------|---------------------|
| Sm100           | NR_041577.1 Stenotrophomonas maltophilia strain IAM 12423 16S ribosomal RNA gene, complete sequence | 9773  | 100%  | 100%           | 100%                |
| Sm99            | NR_041577.1 Stenotrophomonas maltophilia strain IAM 12423 16S ribosomal RNA gene, complete sequence | 9773  | 99.5% | 100%           | 98.9%               |
| Sm98            | NR_041577.1 Stenotrophomonas maltophilia strain IAM 12423 16S ribosomal RNA gene, complete sequence | 9773  | 98.9% | 100%           | 97.8%               |
| Sm96            | NR_041577.1 Stenotrophomonas maltophilia strain IAM 12423 16S ribosomal RNA gene, complete sequence | 9773  | 97.9% | 100%           | 95.8%               |
| Sm94            | NR_041577.1 Stenotrophomonas maltophilia strain IAM 12423 16S ribosomal RNA gene, complete sequence | 9773  | 96.8% | 100%           | 93.6%               |
| Sm93            | NR_041577.1 Stenotrophomonas maltophilia strain IAM 12423 16S ribosomal RNA gene, complete sequence | 9773  | 96.4% | 100%           | 92.8%               |
| Sm91            | NR_041577.1 Stenotrophomonas maltophilia strain IAM 12423 16S ribosomal RNA gene, complete sequence | 9773  | 95.7% | 100%           | 91.4%               |
| Sm90            | NR_041577.1 Stenotrophomonas maltophilia strain IAM 12423 16S ribosomal RNA gene, complete sequence | 9773  | 95%   | 100%           | 89.9%               |
| Sm89            | NR_041577.1 Stenotrophomonas maltophilia strain IAM 12423 16S ribosomal RNA gene, complete sequence | 9773  | 94.5% | 100%           | 88.9%               |
| Sm88            | NR_041577.1 Stenotrophomonas maltophilia strain IAM 12423 16S ribosomal RNA gene, complete sequence | 9773  | 94.1% | 100%           | 88.1%               |
| Sm87            | NR_041577.1 Stenotrophomonas maltophilia strain IAM 12423 16S ribosomal RNA gene, complete sequence | 9773  | 93.5% | 100%           | 87%                 |
| Sm86            | NR_041577.1 Stenotrophomonas maltophilia strain IAM 12423 16S ribosomal RNA gene, complete sequence | 9773  | 92.8% | 100%           | 85.5%               |
| SM84            | NR_041577.1 Stenotrophomonas maltophilia strain IAM 12423 16S ribosomal RNA gene, complete sequence | 9773  | 92.1% | 100%           | 84.1%               |
| SM83Indel1      | NR_041577.1 Stenotrophomonas maltophilia strain IAM 12423 16S ribosomal RNA gene, complete sequence | 9773  | 91.6% | 100%           | 83.1%               |
| SM81Indel2      | NR_041577.1 Stenotrophomonas maltophilia strain IAM 12423 16S ribosomal RNA gene, complete sequence | 9773  | 90.7% | 100%           | 81.4%               |
| SM79Indel3      | NR_041577.1 Stenotrophomonas maltophilia strain IAM 12423 16S ribosomal RNA gene, complete sequence | 9773  | 90%   | 100%           | 79.9%               |
| Cnitrat100      | NR_025376.1 Comamonas nitrativorans strain 23310 16S ribosomal RNA gene, partial sequence           | 11440 | 100%  | 100%           | 100%                |
| Cnitrat99       | NR_025376.1 Comamonas nitrativorans strain 23310 16S ribosomal RNA gene, partial sequence           | 11440 | 99.4% | 100%           | 98.9%               |
| Cnitrat98       | NR_025376.1 Comamonas nitrativorans strain 23310 16S ribosomal RNA gene, partial sequence           | 11440 | 99%   | 100%           | 97.9%               |
| Cnitrat96       | NR_025376.1 Comamonas nitrativorans strain 23310 16S ribosomal RNA gene, partial sequence           | 11440 | 97.8% | 100%           | 95.7%               |
| Cnitrat95       | NR_025376.1 Comamonas nitrativorans strain 23310 16S ribosomal RNA gene, partial sequence           | 11440 | 97.3% | 100%           | 94.7%               |
| Cnitrat93       | NR_025376.1 Comamonas nitrativorans strain 23310 16S ribosomal RNA gene, partial sequence           | 11440 | 96.7% | 100%           | 93.3%               |
| cNitrati92      | NR_025376.1 Comamonas nitrativorans strain 23310 16S ribosomal RNA gene, partial sequence           | 11440 | 95.8% | 100%           | 91.7%               |
| Cnitrat91       | NR_025376.1 Comamonas nitrativorans strain 23310 16S ribosomal RNA gene, partial sequence           | 11440 | 95.4% | 100%           | 90.9%               |
| Cnitrat90       | NR_025376.1 Comamonas nitrativorans strain 23310 16S ribosomal RNA gene, partial sequence           | 11440 | 95%   | 100%           | 90.1%               |
| Cnitrat89       | NR_025376.1 Comamonas nitrativorans strain 23310 16S ribosomal RNA gene, partial sequence           | 11440 | 94.4% | 100%           | 88.9%               |
| Cnitrat87       | NR_025376.1 Comamonas nitrativorans strain 23310 16S ribosomal RNA gene, partial sequence           | 11440 | 93.5% | 100%           | 87%                 |
| Cnitrat85       | NR_025376.1 Comamonas nitrativorans strain 23310 16S ribosomal RNA gene, partial sequence           | 11440 | 92.7% | 99.93%         | 85.4%               |
| Cnitrat81Indel1 | NR_025376.1 Comamonas nitrativorans strain 23310 16S ribosomal RNA gene, partial sequence           | 11440 | 91.3% | 99.94%         | 82.7%               |
| Cnitrat79Indel2 | NR_025376.1 Comamonas nitrativorans strain 23310 16S ribosomal RNA gene, partial sequence           | 11440 | 90%   | 99.94%         | 80.1%               |
| Cdenit100       | NR_025080.1 Comamonas denitrificans strain 123 16S ribosomal RNA gene, partial sequence             | 11567 | 97.4% | 94.87%         | 99.9%               |
| Cdenit99        | NR_025080.1 Comamonas denitrificans strain 123 16S ribosomal RNA gene, partial sequence             | 11567 | 96.7% | 94.87%         | 98.6%               |
| Cdenit97        | NR_025080.1 Comamonas denitrificans strain 123 16S ribosomal RNA gene, partial sequence             | 11567 | 96%   | 94.87%         | 97.2%               |
| Cdenit96        | NR_025080.1 Comamonas denitrificans strain 123 16S ribosomal RNA gene, partial sequence             | 11567 | 95.3% | 94.87%         | 95.7%               |
| Cdenit95        | NR_025080.1 Comamonas denitrificans strain 123 16S ribosomal RNA gene, partial sequence             | 11567 | 94.9% | 94.87%         | 95%                 |
| Cdenit94        | NR_025080.1 Comamonas denitrificans strain 123 16S ribosomal RNA gene, partial sequence             | 11567 | 94.3% | 94.74%         | 93.9%               |
| Cdenit92        | NR_025080.1 Comamonas denitrificans strain 123 16S ribosomal RNA gene, partial sequence             | 11567 | 93.6% | 94.74%         | 92.4%               |
| Cdenit90        | NR_025080.1 Comamonas denitrificans strain 123 16S ribosomal RNA gene, partial sequence             | 11567 | 92.4% | 94.74%         | 90.1%               |
| Cdenit89        | NR_025080.1 Comamonas denitrificans strain 123 16S ribosomal RNA gene, partial sequence             | 11567 | 91.9% | 94.74%         | 89%                 |
| Cdenit87        | NR_025080.1 Comamonas denitrificans strain 123 16S ribosomal RNA gene, partial sequence             | 11567 | 90.9% | 94.74%         | 87.2%               |
| Cdenit86        | NR_025080.1 Comamonas denitrificans strain 123 16S ribosomal RNA gene, partial sequence             | 11567 | 90.5% | 94.74%         | 86.2%               |
| Cdenit85        | NR_025080.1 Comamonas denitrificans strain 123 16S ribosomal RNA gene, partial sequence             | 11567 | 89.6% | 94.74%         | 84.4%               |
| Cdenit81Indel1  | NR_025080.1 Comamonas denitrificans strain 123 16S ribosomal RNA gene, partial sequence             | 11567 | 87.9% | 94.92%         | 80.9%               |
| Cdenit79Indel2  | NR_025080.1 Comamonas denitrificans strain 123 16S ribosomal RNA gene, partial sequence             | 11567 | 87.1% | 94.89%         | 79.3%               |
